# Supplementary material for: Four series of lanthanide coordination polymers based on the tetrabromobenzene-1,4-dicarboxylate ligand: structural diversity and multifunctional properties
Source: Royal Society of Chemistry journal article supplement (doi:10.1039/d2dt00007e), 2022-01-01
Supplement: d2dt00007e1.pdf [file d2dt00007e1.pdf]

## Electronic Supplementary Information

### Four series of lanthanide coordination polymers based on the tetrabromobenzene-1,4-dicarboxylate ligand: structural diversity and multifunctional properties

Suwadee Jiajaroen,<sup>a,b</sup> Winya Dungkaew,<sup>c</sup> Filip Kielar,<sup>d</sup> Mongkol Sukwattanasinitt,<sup>e</sup> Somboon Sahasithiwat,<sup>f</sup> Hikaru Zenno,<sup>g</sup> Shinya Hayami,<sup>g</sup> Mohammad Azam,<sup>h</sup> Saud I. Al-Resayes<sup>h</sup> and Kittipong Chainok<sup>\*a</sup>

<sup>a</sup>Thammasat University Research Unit in Multifunctional Crystalline Materials and Applications (TU-MCMA), Faculty of Science and Technology, Thammasat University, Pathum Thani 12121, Thailand

<sup>b</sup>Department of Chemistry, Faculty of Science and Technology, Thammasat University, Pathum Thani 12121, Thailand

<sup>c</sup>Department of Chemistry, Faculty of Science, Mahasarakham University, Maha Sarakham 43100, Thailand

<sup>d</sup>Department of Chemistry, Faculty of Science, Naresuan University, Phitsanulok 65000, Thailand

<sup>e</sup>Department of Chemistry, Faculty of Science, Chulalongkorn University, Bangkok 10330, Thailand

<sup>f</sup>National Metal and Materials Technology Center (MTEC), The National Science and Technology Development Agency, Pathum Thani 12121, Thailand

<sup>g</sup>Department of Chemistry, Graduate School of Science and Technology and Institute of Pulsed Power Science, Ku-mamoto University, 2-39-1 Kurokami, Chuoku, Kumamoto 860-8555 Japan

<sup>h</sup>Department of Chemistry, College of Sciences, King Saud University, PO BOX 2455, Riyadh 11451, Kingdom of Saudi Arabia

**Table S1** Crystal data and structural refinements for compounds in series **1<sub>Ln</sub>** and **2<sub>Ln</sub>**.

| Identification code (CCDC no.)                                              | <b>1<sub>Ce</sub></b> (1940034)                                                                | <b>1<sub>Pr</sub></b> (1940036)                                                                | <b>1<sub>Nd</sub></b> (1940037)                                                                | <b>1<sub>Sm</sub></b> (1940038)                                                                |
|-----------------------------------------------------------------------------|------------------------------------------------------------------------------------------------|------------------------------------------------------------------------------------------------|------------------------------------------------------------------------------------------------|------------------------------------------------------------------------------------------------|
| Formula                                                                     | C <sub>15</sub> H <sub>12</sub> Br <sub>6</sub> CeO <sub>9</sub>                               | C <sub>15</sub> H <sub>12</sub> Br <sub>6</sub> O <sub>9</sub> Pr                              | C <sub>15</sub> H <sub>12</sub> Br <sub>6</sub> NdO <sub>9</sub>                               | C <sub>15</sub> H <sub>12</sub> Br <sub>6</sub> O <sub>9</sub> Sm                              |
| Formula weigh                                                               | 955.83                                                                                         | 956.56                                                                                         | 959.95                                                                                         | 966.01                                                                                         |
| Temperature (K)                                                             | 296(2)                                                                                         | 296(2)                                                                                         | 296(2)                                                                                         | 296(2)                                                                                         |
| Crystal system                                                              | Monoclinic                                                                                     | Monoclinic                                                                                     | Monoclinic                                                                                     | Monoclinic                                                                                     |
| Space group                                                                 | <i>C2/c</i>                                                                                    | <i>C2/c</i>                                                                                    | <i>C2/c</i>                                                                                    | <i>C2/c</i>                                                                                    |
| <i>a</i> (Å)                                                                | 20.482(5)                                                                                      | 20.4250(15)                                                                                    | 20.3900(4)                                                                                     | 20.281(3)                                                                                      |
| <i>b</i> (Å)                                                                | 10.656(3)                                                                                      | 10.6255(7)                                                                                     | 10.6244(2)                                                                                     | 10.5811(16)                                                                                    |
| <i>c</i> (Å)                                                                | 22.090(6)                                                                                      | 22.0706(15)                                                                                    | 22.1112(5)                                                                                     | 22.039(4)                                                                                      |
| $\beta$ (°)                                                                 | 94.658(9)                                                                                      | 94.676(3)                                                                                      | 94.8930(10)                                                                                    | 94.821(5)                                                                                      |
| <i>V</i> (Å <sup>3</sup> )                                                  | 4806(2)                                                                                        | 4773.9(6)                                                                                      | 4772.53(17)                                                                                    | 4712.7(13)                                                                                     |
| <i>Z</i>                                                                    | 8                                                                                              | 8                                                                                              | 8                                                                                              | 8                                                                                              |
| $\rho_{\text{calcd}}$ (g cm <sup>-3</sup> )                                 | 2.642                                                                                          | 2.662                                                                                          | 2.672                                                                                          | 2.723                                                                                          |
| GOF on <i>F</i> <sup>2</sup> , <i>S</i>                                     | 1.041                                                                                          | 1.036                                                                                          | 1.122                                                                                          | 1.062                                                                                          |
| <i>R</i> <sub>1</sub> , <i>wR</i> <sub>2</sub> [ <i>I</i> > 2σ( <i>I</i> )] | 0.0221, 0.0435                                                                                 | 0.0231, 0.0459                                                                                 | 0.0211, 0.0450                                                                                 | 0.0261, 0.0499                                                                                 |
| $\Delta\rho_{\text{max}}$ , $\Delta\rho_{\text{min}}$ (e Å <sup>-3</sup> )  | 0.56, -0.59                                                                                    | 0.65, -0.56                                                                                    | 0.51, -0.88                                                                                    | 0.94, -0.65                                                                                    |
| Identification code (CCDC no.)                                              | <b>1<sub>Eu</sub></b> (1940039)                                                                | <b>1<sub>Gd</sub></b> (1940040)                                                                | <b>1<sub>Tb</sub></b> (1940041)                                                                | <b>1<sub>Dy</sub></b> (2130091)                                                                |
| Formula                                                                     | C <sub>15</sub> H <sub>12</sub> Br <sub>6</sub> EuO <sub>9</sub>                               | C <sub>15</sub> H <sub>12</sub> Br <sub>6</sub> GdO <sub>9</sub>                               | C <sub>15</sub> H <sub>12</sub> Br <sub>6</sub> O <sub>9</sub> Tb                              | C <sub>15</sub> H <sub>12</sub> Br <sub>6</sub> DyO <sub>9</sub>                               |
| Formula weigh                                                               | 967.62                                                                                         | 972.90                                                                                         | 974.58                                                                                         | 978.21                                                                                         |
| Temperature (K)                                                             | 296(2)                                                                                         | 296(2)                                                                                         | 296(2)                                                                                         | 296(2)                                                                                         |
| Crystal system                                                              | Monoclinic                                                                                     | Monoclinic                                                                                     | Monoclinic                                                                                     | Monoclinic                                                                                     |
| Space group                                                                 | <i>C2/c</i>                                                                                    | <i>C2/c</i>                                                                                    | <i>C2/c</i>                                                                                    | <i>C2/c</i>                                                                                    |
| <i>a</i> (Å)                                                                | 20.2349(12)                                                                                    | 20.2230(11)                                                                                    | 20.1546(15)                                                                                    | 20.140(3)                                                                                      |
| <i>b</i> (Å)                                                                | 10.5715(6)                                                                                     | 10.5573(6)                                                                                     | 10.5416(8)                                                                                     | 10.5370(11)                                                                                    |
| <i>c</i> (Å)                                                                | 22.0267(15)                                                                                    | 22.0212(12)                                                                                    | 22.0160(17)                                                                                    | 21.997(3)                                                                                      |
| $\beta$ (°)                                                                 | 94.846(2)                                                                                      | 94.884(2)                                                                                      | 94.940(3)                                                                                      | 94.896(5)                                                                                      |
| <i>V</i> (Å <sup>3</sup> )                                                  | 4695.0(5)                                                                                      | 4684.5(4)                                                                                      | 4660.2(6)                                                                                      | 4650.9(10)                                                                                     |
| <i>Z</i>                                                                    | 8                                                                                              | 8                                                                                              | 8                                                                                              | 8                                                                                              |
| $\rho_{\text{calcd}}$ (g cm <sup>-3</sup> )                                 | 2.738                                                                                          | 2.759                                                                                          | 2.778                                                                                          | 2.794                                                                                          |
| GOF on <i>F</i> <sup>2</sup> , <i>S</i>                                     | 1.031                                                                                          | 1.040                                                                                          | 1.019                                                                                          | 1.056                                                                                          |
| <i>R</i> <sub>1</sub> , <i>wR</i> <sub>2</sub> [ <i>I</i> > 2σ( <i>I</i> )] | 0.0237, 0.0470                                                                                 | 0.0207, 0.0417                                                                                 | 0.0279, 0.0480                                                                                 | 0.0250, 0.0541                                                                                 |
| $\Delta\rho_{\text{max}}$ , $\Delta\rho_{\text{min}}$ (e Å <sup>-3</sup> )  | 0.89, -0.66                                                                                    | 0.69, -0.55                                                                                    | 0.69, -0.68                                                                                    | 0.82, -0.76                                                                                    |
| Identification code (CCDC no.)                                              | <b>2<sub>Ce</sub></b> (1940063)                                                                | <b>2<sub>Pr</sub></b> (1940047)                                                                | <b>2<sub>Nd</sub></b> (1940048)                                                                | <b>2<sub>Sm</sub></b> (1940091)                                                                |
| Formula                                                                     | C <sub>20</sub> H <sub>16</sub> Br <sub>8</sub> Ce <sub>2</sub> N <sub>2</sub> O <sub>18</sub> | C <sub>20</sub> H <sub>16</sub> Br <sub>8</sub> N <sub>2</sub> O <sub>18</sub> Pr <sub>2</sub> | C <sub>20</sub> H <sub>16</sub> Br <sub>8</sub> N <sub>2</sub> Nd <sub>2</sub> O <sub>18</sub> | C <sub>20</sub> H <sub>16</sub> Br <sub>8</sub> N <sub>2</sub> O <sub>18</sub> Sm <sub>2</sub> |
| Formula weigh                                                               | 1491.87                                                                                        | 1493.45                                                                                        | 1500.11                                                                                        | 1512.27                                                                                        |
| Temperature (K)                                                             | 296(2)                                                                                         | 296(2)                                                                                         | 296(2)                                                                                         | 296(2)                                                                                         |
| Crystal system                                                              | Triclinic                                                                                      | Triclinic                                                                                      | Triclinic                                                                                      | Triclinic                                                                                      |
| Space group                                                                 | <i>P</i> -1                                                                                    | <i>P</i> -1                                                                                    | <i>P</i> -1                                                                                    | <i>P</i> -1                                                                                    |
| <i>a</i> (Å)                                                                | 10.4200(10)                                                                                    | 10.3657(7)                                                                                     | 10.3427(12)                                                                                    | 10.2732(7)                                                                                     |
| <i>b</i> (Å)                                                                | 12.6555(12)                                                                                    | 12.6197(8)                                                                                     | 12.6185(16)                                                                                    | 12.5854(7)                                                                                     |
| <i>c</i> (Å)                                                                | 16.2502(18)                                                                                    | 16.2172(9)                                                                                     | 16.2191(18)                                                                                    | 16.1710(9)                                                                                     |
| $\alpha$ (°)                                                                | 77.141(4)                                                                                      | 77.345(2)                                                                                      | 77.419(4)                                                                                      | 77.559(2)                                                                                      |
| $\beta$ (°)                                                                 | 72.822(3)                                                                                      | 72.943(2)                                                                                      | 72.879(4)                                                                                      | 72.835(2)                                                                                      |
| $\gamma$ (°)                                                                | 68.507(3)                                                                                      | 68.733(2)                                                                                      | 68.729(5)                                                                                      | 68.6920(10)                                                                                    |
| <i>V</i> (Å <sup>3</sup> )                                                  | 1889.1(3)                                                                                      | 1874.8(2)                                                                                      | 1870.4(4)                                                                                      | 1847.30(19)                                                                                    |
| <i>Z</i>                                                                    | 2                                                                                              | 2                                                                                              | 2                                                                                              | 2                                                                                              |
| $\rho_{\text{calcd}}$ (g cm <sup>-3</sup> )                                 | 2.623                                                                                          | 2.646                                                                                          | 2.664                                                                                          | 2.719                                                                                          |
| GOF on <i>F</i> <sup>2</sup> , <i>S</i>                                     | 1.066                                                                                          | 1.047                                                                                          | 1.039                                                                                          | 1.019                                                                                          |
| <i>R</i> <sub>1</sub> , <i>wR</i> <sub>2</sub> [ <i>I</i> > 2σ( <i>I</i> )] | 0.0361, 0.0826                                                                                 | 0.0284, 0.0565                                                                                 | 0.0358, 0.0915                                                                                 | 0.0349, 0.0751                                                                                 |
| $\Delta\rho_{\text{max}}$ , $\Delta\rho_{\text{min}}$ (e Å <sup>-3</sup> )  | 1.48, -0.84                                                                                    | 0.99, -0.86                                                                                    | 1.60, -1.76                                                                                    | 0.88, -1.07                                                                                    |

**Table S2** Crystal data and structural refinements for compounds in series **3<sub>Ln</sub>** and **4<sub>Ln</sub>**.

| Identification code (CCDC no.)                                              | <b>3<sub>Gd</sub></b> (1940055)                                                      | <b>3<sub>Tb</sub></b> (1940056)                                                      | <b>3<sub>Dy</sub></b> (1940057)                                                      |
|-----------------------------------------------------------------------------|--------------------------------------------------------------------------------------|--------------------------------------------------------------------------------------|--------------------------------------------------------------------------------------|
| Formula                                                                     | C <sub>9</sub> H <sub>4</sub> Br <sub>4</sub> GdNO <sub>8</sub>                      | C <sub>9</sub> H <sub>4</sub> Br <sub>4</sub> NO <sub>8</sub> Tb                     | C <sub>9</sub> H <sub>4</sub> Br <sub>4</sub> DyNO <sub>8</sub>                      |
| Formula weigh                                                               | 730.98                                                                               | 732.69                                                                               | 736.23                                                                               |
| Temperature (K)                                                             | 296(2)                                                                               | 296(2)                                                                               | 296(2)                                                                               |
| Crystal system                                                              | Triclinic                                                                            | Triclinic                                                                            | Triclinic                                                                            |
| Space group                                                                 | <i>P</i> -1                                                                          | <i>P</i> -1                                                                          | <i>P</i> -1                                                                          |
| <i>a</i> (Å)                                                                | 9.165(2)                                                                             | 9.1698(3)                                                                            | 9.1555(7)                                                                            |
| <i>b</i> (Å)                                                                | 9.216(2)                                                                             | 9.1909(3)                                                                            | 9.1608(7)                                                                            |
| <i>c</i> (Å)                                                                | 10.039(2)                                                                            | 10.0385(2)                                                                           | 10.0141(8)                                                                           |
| $\alpha$ (°)                                                                | 104.271(8)                                                                           | 104.2990(10)                                                                         | 104.319(2)                                                                           |
| $\beta$ (°)                                                                 | 93.426(8)                                                                            | 93.4920(10)                                                                          | 93.375(3)                                                                            |
| $\gamma$ (°)                                                                | 99.634(9)                                                                            | 99.6490(10)                                                                          | 99.769(3)                                                                            |
| <i>V</i> (Å <sup>3</sup> )                                                  | 805.6(3)                                                                             | 803.58(4)                                                                            | 797.52(11)                                                                           |
| <i>Z</i>                                                                    | 2                                                                                    | 2                                                                                    | 2                                                                                    |
| $\rho_{\text{calcd}}$ (g cm <sup>-3</sup> )                                 | 3.013                                                                                | 3.028                                                                                | 3.066                                                                                |
| GOF on <i>F</i> <sup>2</sup> , <i>S</i>                                     | 1.025                                                                                | 1.069                                                                                | 1.178                                                                                |
| <i>R</i> <sub>1</sub> , <i>wR</i> <sub>2</sub> [ <i>I</i> > 2σ( <i>I</i> )] | 0.0242, 0.0496                                                                       | 0.0246, 0.0472                                                                       | 0.0321, 0.0842                                                                       |
| $\Delta\rho_{\text{max}}$ , $\Delta\rho_{\text{min}}$ (e Å <sup>-3</sup> )  | 1.20, -1.02                                                                          | 1.11, -0.81                                                                          | 1.63, -1.12                                                                          |
| Compound (CCDC No.)                                                         | <b>4<sub>Gd</sub></b> (1940050)                                                      | <b>4<sub>Tb</sub></b> (1940051)                                                      | <b>4<sub>Dy</sub></b> (1940054)                                                      |
| Formula                                                                     | C <sub>26.7</sub> H <sub>15.4</sub> Br <sub>12</sub> Gd <sub>2</sub> O <sub>17</sub> | C <sub>26.7</sub> H <sub>15.4</sub> Br <sub>12</sub> O <sub>17</sub> Tb <sub>2</sub> | C <sub>26.7</sub> H <sub>15.4</sub> Br <sub>12</sub> Dy <sub>2</sub> O <sub>17</sub> |
| Formula weigh                                                               | 1881.49                                                                              | 1884.85                                                                              | 1891.99                                                                              |
| Temperature (K)                                                             | 296(2)                                                                               | 296(2)                                                                               | 296(2)                                                                               |
| Crystal system                                                              | Monoclinic                                                                           | Monoclinic                                                                           | Monoclinic                                                                           |
| Space group                                                                 | <i>P</i> 2 <sub>1</sub> / <i>n</i>                                                   | <i>P</i> 2 <sub>1</sub> / <i>n</i>                                                   | <i>P</i> 2 <sub>1</sub> / <i>n</i>                                                   |
| <i>a</i> (Å)                                                                | 11.587(5)                                                                            | 11.634(6)                                                                            | 11.550(4)                                                                            |
| <i>b</i> (Å)                                                                | 18.133(7)                                                                            | 18.038(8)                                                                            | 17.970(5)                                                                            |
| <i>c</i> (Å)                                                                | 21.632(9)                                                                            | 21.569(12)                                                                           | 21.577(6)                                                                            |
| $\beta$ (°)                                                                 | 97.686(15)                                                                           | 98.005(19)                                                                           | 97.910(10)                                                                           |
| <i>V</i> (Å <sup>3</sup> )                                                  | 4504(3)                                                                              | 4482(4)                                                                              | 4436(2)                                                                              |
| <i>Z</i>                                                                    | 4                                                                                    | 4                                                                                    | 4                                                                                    |
| $\rho_{\text{calcd}}$ (g cm <sup>-3</sup> )                                 | 2.775                                                                                | 2.793                                                                                | 2.833                                                                                |
| GOF on <i>F</i> <sup>2</sup> , <i>S</i>                                     | 1.012                                                                                | 1.062                                                                                | 1.066                                                                                |
| <i>R</i> <sub>1</sub> , <i>wR</i> <sub>2</sub> [ <i>I</i> > 2σ( <i>I</i> )] | 0.0326, 0.0619                                                                       | 0.0322, 0.0614                                                                       | 0.0435, 0.0772                                                                       |
| $\Delta\rho_{\text{max}}$ , $\Delta\rho_{\text{min}}$ (e Å <sup>-3</sup> )  | 1.29, -0.82                                                                          | 1.22, -0.63                                                                          | 1.39, -0.95                                                                          |

**Table S3** Selected bond lengths (Å) and bond angles (°) for **1<sub>Ln</sub>**.

|                                       | <b>1<sub>Ce</sub></b> | <b>2<sub>Pr</sub></b> | <b>3<sub>Nd</sub></b> | <b>4<sub>Sm</sub></b> | <b>5<sub>Eu</sub></b> | <b>6<sub>Gd</sub></b> | <b>7<sub>Tb</sub></b> | <b>8<sub>Dy</sub></b> |
|---------------------------------------|-----------------------|-----------------------|-----------------------|-----------------------|-----------------------|-----------------------|-----------------------|-----------------------|
| Ln1–O1                                | 2.382(2)              | 2.362(2)              | 2.3619(18)            | 2.337(3)              | 2.334(3)              | 2.327(2)              | 2.312(3)              | 2.308(2)              |
| Ln1–O3 <sup>i</sup>                   | 2.551(2)              | 2.533(2)              | 2.5222(19)            | 2.490(3)              | 2.479(3)              | 2.478(2)              | 2.457(3)              | 2.449(2)              |
| Ln1–O4 <sup>i</sup>                   | 2.616(2)              | 2.599(2)              | 2.5792(18)            | 2.548(3)              | 2.537(3)              | 2.520(2)              | 2.504(3)              | 2.500(2)              |
| Ln1–O5                                | 2.484(2)              | 2.464(2)              | 2.4513(18)            | 2.420(3)              | 2.406(3)              | 2.396(2)              | 2.378(3)              | 2.364(2)              |
| Ln1–O6 <sup>ii</sup>                  | 2.378(2)              | 2.363(3)              | 2.3509(19)            | 2.317(3)              | 2.306(3)              | 2.291(2)              | 2.275(3)              | 2.261(2)              |
| Ln1–O7                                | 2.487(3)              | 2.471(3)              | 2.457(2)              | 2.418(3)              | 2.404(3)              | 2.389(3)              | 2.372(3)              | 2.359(3)              |
| Ln1–O8                                | 2.537(2)              | 2.517(3)              | 2.499(2)              | 2.466(3)              | 2.451(3)              | 2.441(2)              | 2.421(3)              | 2.414(3)              |
| Ln1–O9                                | 2.482(2)              | 2.465(3)              | 2.446(2)              | 2.412(3)              | 2.403(3)              | 2.389(2)              | 2.371(3)              | 2.364(3)              |
| O1–Ln1–O3 <sup>i</sup>                | 155.50(9)             | 155.35(9)             | 155.05(7)             | 154.47(10)            | 154.27(9)             | 153.84(8)             | 153.71(11)            | 153.40(9)             |
| O1–Ln1–O4 <sup>i</sup>                | 125.36(8)             | 125.25(9)             | 125.14(7)             | 125.22(10)            | 125.25(10)            | 125.16(8)             | 125.26(11)            | 125.12(9)             |
| O1–Ln1–O5                             | 134.55(9)             | 134.55(9)             | 134.79(7)             | 135.18(10)            | 135.29(9)             | 135.57(8)             | 135.76(11)            | 135.82(9)             |
| O1–Ln1–O7                             | 74.60(9)              | 74.39(10)             | 74.04(7)              | 73.99(11)             | 74.01(10)             | 73.91(9)              | 73.85(12)             | 73.78(9)              |
| O1–Ln1–O8                             | 73.16(9)              | 73.00(9)              | 73.10(7)              | 72.90(11)             | 72.80(10)             | 72.99(9)              | 72.83(12)             | 72.98(9)              |
| O1–Ln1–O9                             | 78.29(9)              | 78.34(10)             | 78.05(8)              | 77.81(11)             | 77.61(10)             | 77.28(9)              | 77.26(12)             | 76.97(9)              |
| O3 <sup>i</sup> –Ln1–O4 <sup>i</sup>  | 50.19(7)              | 50.72(8)              | 51.09(6)              | 51.62(10)             | 51.96(9)              | 52.05(8)              | 52.34(10)             | 52.55(8)              |
| O5–Ln1–O3 <sup>i</sup>                | 69.94(8)              | 70.08(8)              | 70.13(7)              | 70.29(10)             | 70.36(9)              | 70.51(8)              | 70.42(11)             | 70.66(9)              |
| O5–Ln1–O4 <sup>i</sup>                | 78.88(8)              | 78.79(8)              | 78.65(6)              | 78.34(10)             | 78.27(9)              | 78.31(8)              | 78.00(11)             | 78.18(8)              |
| O5–Ln1–O7                             | 78.71(9)              | 78.75(9)              | 79.16(7)              | 79.38(11)             | 79.38(10)             | 79.65(9)              | 79.67(12)             | 79.91(9)              |
| O5–Ln1–O8                             | 72.95(8)              | 72.99(9)              | 72.90(7)              | 72.82(10)             | 72.82(9)              | 72.67(8)              | 72.79(11)             | 72.53(9)              |
| O6 <sup>ii</sup> –Ln1–O1              | 94.27(9)              | 94.15(9)              | 93.60(7)              | 92.66(11)             | 92.32(10)             | 91.84(9)              | 91.43(11)             | 91.14(9)              |
| O6 <sup>ii</sup> –Ln1–O3 <sup>i</sup> | 74.61(8)              | 74.45(8)              | 74.73(6)              | 75.07(10)             | 74.99(9)              | 75.34(8)              | 75.36(11)             | 75.53(8)              |
| O6 <sup>ii</sup> –Ln1–O4 <sup>i</sup> | 119.93(8)             | 120.42(8)             | 121.15(6)             | 122.24(10)            | 122.50(9)             | 123.04(8)             | 123.32(11)            | 123.80(8)             |
| O6 <sup>ii</sup> –Ln1–O5              | 105.49(8)             | 105.46(9)             | 105.60(7)             | 105.73(11)            | 105.88(10)            | 105.84(9)             | 106.17(11)            | 106.05(9)             |
| O6 <sup>ii</sup> –Ln1–O7              | 166.86(9)             | 166.37(10)            | 165.46(7)             | 164.23(11)            | 163.87(10)            | 163.14(9)             | 162.70(12)            | 162.26(10)            |
| O6 <sup>ii</sup> –Ln1–O8              | 75.44(9)              | 75.46(9)              | 75.38(7)              | 75.55(11)             | 75.72(10)             | 75.49(9)              | 75.85(12)             | 75.63(9)              |
| O6 <sup>ii</sup> –Ln1–O9              | 81.84(9)              | 81.90(10)             | 82.11(8)              | 82.25(12)             | 82.39(11)             | 82.60(9)              | 82.39(13)             | 82.77(10)             |
| O7–Ln1–O3 <sup>i</sup>                | 118.34(9)             | 118.96(9)             | 119.62(7)             | 120.49(11)            | 120.93(10)            | 121.31(9)             | 121.74(12)            | 122.02(9)             |
| O7–Ln1–O4 <sup>i</sup>                | 72.91(9)              | 72.94(9)              | 73.04(7)              | 73.18(11)             | 73.27(10)             | 73.45(9)              | 73.56(11)             | 73.50(9)              |
| O7–Ln1–O8                             | 94.35(9)              | 93.83(10)             | 93.37(7)              | 92.20(12)             | 91.77(11)             | 91.44(9)              | 90.84(13)             | 90.75(10)             |
| O8–Ln1–O3 <sup>i</sup>                | 122.91(8)             | 122.97(8)             | 123.01(7)             | 123.43(10)            | 123.47(10)            | 123.61(8)             | 123.72(11)            | 123.76(9)             |
| O8–Ln1–O4 <sup>i</sup>                | 150.93(8)             | 150.74(8)             | 150.37(7)             | 149.66(10)            | 149.49(9)             | 149.30(8)             | 148.94(11)            | 148.80(9)             |
| O9–Ln1–O3 <sup>i</sup>                | 78.55(9)              | 78.45(9)              | 78.54(7)              | 78.39(11)             | 78.56(10)             | 78.50(9)              | 78.50(12)             | 78.56(10)             |
| O9–Ln1–O4 <sup>i</sup>                | 67.38(8)              | 67.55(9)              | 67.77(7)              | 68.21(10)             | 68.27(9)              | 68.40(8)              | 68.59(11)             | 68.62(9)              |
| O9–Ln1–O5                             | 143.92(8)             | 143.90(9)             | 143.95(7)             | 143.94(11)            | 144.00(10)            | 144.13(9)             | 143.97(11)            | 144.21(9)             |
| O9–Ln1–O7                             | 102.23(10)            | 102.48(10)            | 102.26(8)             | 102.54(12)            | 102.46(11)            | 102.44(10)            | 102.61(14)            | 102.31(10)            |
| O9–Ln1–O8                             | 141.67(9)             | 141.68(9)             | 141.81(7)             | 141.99(11)            | 142.05(10)            | 142.09(9)             | 142.20(12)            | 142.27(9)             |

Symmetry codes: (i)  $x - 1/2, y - 1/2, z$ ; (ii)  $-x + 1, -y + 1, -z + 1$ ; (iii)  $-x + 1, -y, -z + 1$ ; (iv)  $x + 1/2, y + 1/2, z$ .

**Table S4** Hydrogen bond geometry (Å, °) for **1<sub>Ln</sub>**.

|                       | [D–H···A]                 | <i>d</i> [D–H] | <i>d</i> [H···A] | <i>d</i> [D···A] | ∠[D–H···A] |
|-----------------------|---------------------------|----------------|------------------|------------------|------------|
| <b>1<sub>Ce</sub></b> | O7–H7···O2                | 0.81(1)        | 2.57(4)          | 3.062(4)         | 121(4)     |
|                       | O7–H7···O4 <sup>i</sup>   | 0.81(1)        | 2.14(2)          | 2.904(4)         | 156(4)     |
|                       | O8–H8···O3 <sup>ii</sup>  | 0.82(1)        | 1.92(1)          | 2.728(4)         | 173(5)     |
|                       | O9–H9···O2 <sup>iii</sup> | 0.82(1)        | 1.84(1)          | 2.643(4)         | 168(4)     |
| <b>1<sub>Pr</sub></b> | O7–H7···O2                | 0.82(1)        | 2.56(4)          | 3.033(4)         | 119(4)     |
|                       | O7–H7···O4 <sup>i</sup>   | 0.82(1)        | 2.15(2)          | 2.922(4)         | 158(5)     |
|                       | O8–H8···O3 <sup>ii</sup>  | 0.82(1)        | 1.91(1)          | 2.731(4)         | 178(5)     |
|                       | O9–H9···O2 <sup>iii</sup> | 0.82(1)        | 1.85(2)          | 2.645(4)         | 164(5)     |
| <b>1<sub>Nd</sub></b> | O7–H7···O2                | 0.81(1)        | 2.39(4)          | 2.976(3)         | 129(4)     |
|                       | O7–H7···O4 <sup>iii</sup> | 0.81(1)        | 2.26(3)          | 2.975(3)         | 147(4)     |
|                       | O8–H8···O3 <sup>i</sup>   | 0.82(1)        | 1.91(1)          | 2.727(3)         | 175(4)     |
|                       | O9–H9···O2 <sup>ii</sup>  | 0.82(1)        | 1.84(1)          | 2.645(3)         | 168(4)     |
| <b>1<sub>Sm</sub></b> | O7–H7···O2                | 0.81(1)        | 2.43(5)          | 2.928(5)         | 120(4)     |
|                       | O7–H7···O4 <sup>iii</sup> | 0.81(1)        | 2.26(2)          | 3.022(5)         | 157(5)     |
|                       | O8–H8···O3 <sup>i</sup>   | 0.82(1)        | 1.93(2)          | 2.736(5)         | 171(6)     |
|                       | O9–H9···O2 <sup>ii</sup>  | 0.82(1)        | 1.84(2)          | 2.647(5)         | 167(6)     |
| <b>1<sub>Eu</sub></b> | O7–H7···O2                | 0.82(1)        | 2.35(5)          | 2.904(4)         | 126(5)     |
|                       | O7–H7···O4 <sup>i</sup>   | 0.82(1)        | 2.31(3)          | 3.050(4)         | 151(5)     |
|                       | O8–H8···O3 <sup>ii</sup>  | 0.82(1)        | 1.91(1)          | 2.732(4)         | 176(5)     |
|                       | O9–H9···O2 <sup>iii</sup> | 0.82(1)        | 1.85(2)          | 2.648(4)         | 165(6)     |
| <b>1<sub>Gd</sub></b> | O7–H7···O2                | 0.82(1)        | 2.22(4)          | 2.877(4)         | 138(5)     |
|                       | O7–H7···O4 <sup>iii</sup> | 0.82(1)        | 2.43(4)          | 3.082(4)         | 137(5)     |
|                       | O8–H8···O3 <sup>i</sup>   | 0.82(1)        | 1.91(1)          | 2.728(4)         | 175(5)     |
|                       | O9–H9···O2 <sup>ii</sup>  | 0.82(1)        | 1.85(1)          | 2.655(4)         | 167(4)     |
| <b>1<sub>Tb</sub></b> | O7–H7···O2                | 0.82(1)        | 2.24(5)          | 2.850(5)         | 132(6)     |
|                       | O7–H7···O4 <sup>iii</sup> | 0.82(1)        | 2.42(4)          | 3.125(5)         | 144(6)     |
|                       | O8–H8···O3 <sup>i</sup>   | 0.82(1)        | 1.93(1)          | 2.735(5)         | 173(6)     |
|                       | O9–H9···O2 <sup>ii</sup>  | 0.82(1)        | 1.85(2)          | 2.660(5)         | 169(6)     |
| <b>1<sub>Dy</sub></b> | O7–H7···O2                | 0.82(1)        | 2.22(5)          | 2.834(4)         | 131(5)     |
|                       | O7–H7···O4 <sup>i</sup>   | 0.82(1)        | 2.44(4)          | 3.131(4)         | 143(5)     |
|                       | O8–H8···O3 <sup>ii</sup>  | 0.82(1)        | 1.91(1)          | 2.731(4)         | 175(5)     |
|                       | O9–H9···O2 <sup>iii</sup> | 0.82(1)        | 1.88(2)          | 2.663(4)         | 160(4)     |

Symmetry codes: (i)  $-x + 3/2, y - 1/2, -z + 1/2$ ; (ii)  $-x + 3/2, -y + 3/2, -z + 1$ ; (iii)  $-x + 1, y, -z + 1/2$ .

**Table S5** Selected bond lengths (Å) and bond angles (°) for **2<sub>Ln</sub>**.

|                         | <b>2<sub>Ce</sub></b> | <b>2<sub>Pr</sub></b> | <b>2<sub>Nd</sub></b> | <b>2<sub>Sm</sub></b> |
|-------------------------|-----------------------|-----------------------|-----------------------|-----------------------|
| Ln1–O1                  | 2.382(4)              | 2.363(3)              | 2.347(4)              | 2.340(4)              |
| Ln1–O3                  | 2.393(4)              | 2.376(3)              | 2.372(4)              | 2.342(5)              |
| Ln1–O5 <sup>i</sup>     | 2.383(4)              | 2.361(3)              | 2.347(4)              | 2.324(5)              |
| Ln1–O7                  | 2.665(5)              | 2.647(3)              | 2.626(4)              | 2.617(5)              |
| Ln1–O8                  | 2.602(5)              | 2.578(3)              | 2.561(4)              | 2.534(5)              |
| Ln1–O10                 | 2.510(5)              | 2.494(3)              | 2.490(4)              | 2.450(5)              |
| Ln1–O11                 | 2.531(6)              | 2.514(4)              | 2.503(5)              | 2.473(5)              |
| Ln1–O13 <sup>i</sup>    | 2.422(4)              | 2.400(3)              | 2.390(3)              | 2.372(4)              |
| Ln2–O2                  | 2.386(4)              | 2.365(3)              | 2.351(4)              | 2.331(5)              |
| Ln2–O4                  | 2.412(4)              | 2.389(3)              | 2.373(4)              | 2.357(4)              |
| Ln2–O6 <sup>ii</sup>    | 2.409(4)              | 2.389(3)              | 2.382(4)              | 2.368(5)              |
| Ln2–O12                 | 2.371(4)              | 2.351(3)              | 2.338(4)              | 2.315(5)              |
| Ln2–O14                 | 2.586(5)              | 2.560(3)              | 2.546(4)              | 2.518(5)              |
| Ln2–O15                 | 2.671(5)              | 2.653(3)              | 2.632(4)              | 2.617(5)              |
| Ln2–O17                 | 2.546(6)              | 2.535(4)              | 2.522(5)              | 2.486(5)              |
| Ln2–O18                 | 2.526(5)              | 2.504(3)              | 2.486(4)              | 2.456(5)              |
| O1–Ln1–O7               | 78.34(15)             | 77.85(10)             | 77.47(14)             | 77.43(16)             |
| O1–Ln1–O8               | 126.16(15)            | 125.97(10)            | 126.15(13)            | 126.74(16)            |
| O1–Ln1–O10              | 76.04(16)             | 76.19(11)             | 76.30(15)             | 76.38(17)             |
| O1–Ln1–O11              | 95.1(2)               | 94.18(13)             | 93.79(18)             | 92.54(19)             |
| O1–Ln1–O13 <sup>i</sup> | 155.77(17)            | 156.31(11)            | 156.49(15)            | 157.19(17)            |
| O3–Ln1–O1               | 89.63(16)             | 89.83(11)             | 89.74(15)             | 89.47(17)             |
| O3–Ln1–O7               | 133.45(16)            | 133.54(11)            | 133.67(15)            | 133.91(16)            |
| O3–Ln1–O8               | 130.70(16)            | 130.40(11)            | 130.07(15)            | 129.92(17)            |
| O3–Ln1–O10              | 76.67(16)             | 76.53(11)             | 76.09(15)             | 75.69(17)             |
| O3–Ln1–O11              | 71.44(18)             | 71.15(12)             | 71.26(16)             | 71.17(19)             |
| O3–Ln1–O13 <sup>i</sup> | 81.36(16)             | 81.01(11)             | 80.73(14)             | 80.78(16)             |
| O5–Ln1–O1               | 86.33(16)             | 86.36(11)             | 86.54(15)             | 87.09(17)             |
| O5–Ln1–O3               | 151.32(17)            | 151.39(12)            | 151.05(16)            | 150.65(18)            |
| O5–Ln1–O7               | 73.30(16)             | 73.14(11)             | 73.28(15)             | 73.48(17)             |
| O5–Ln1–O8               | 72.38(17)             | 72.58(12)             | 73.14(15)             | 73.30(17)             |
| O5–Ln1–O10              | 74.80(16)             | 75.02(11)             | 75.13(15)             | 75.17(17)             |
| O5–Ln1–O11              | 137.19(18)            | 137.38(12)            | 137.62(16)            | 138.09(19)            |
| O5–Ln1–O13 <sup>i</sup> | 90.88(16)             | 91.30(11)             | 91.47(15)             | 91.38(17)             |
| O8–Ln1–O7               | 48.53(14)             | 48.73(9)              | 49.19(12)             | 49.76(15)             |
| O10–Ln1–O7              | 139.94(16)            | 139.76(10)            | 139.72(14)            | 139.74(17)            |
| O10–Ln1–O8              | 138.13(15)            | 138.55(11)            | 139.06(14)            | 139.03(16)            |
| O10–Ln1–O11             | 146.98(19)            | 146.31(13)            | 145.90(16)            | 145.11(19)            |
| O11–Ln1–O7              | 65.24(17)             | 65.44(11)             | 65.53(15)             | 65.62(17)             |
| O11–Ln1–O8              | 72.5(2)               | 72.93(13)             | 72.75(17)             | 73.65(19)             |

|                           |            |            |            |            |
|---------------------------|------------|------------|------------|------------|
| O13 <sup>i</sup> -Ln1-O7  | 123.79(15) | 123.92(10) | 124.29(13) | 123.85(16) |
| O13 <sup>i</sup> -Ln1-O8  | 75.27(15)  | 75.20(10)  | 75.13(13)  | 74.10(16)  |
| O13 <sup>i</sup> -Ln1-O10 | 79.99(16)  | 80.43(11)  | 80.55(14)  | 81.22(16)  |
| O13 <sup>i</sup> -Ln1-O11 | 103.09(18) | 103.30(12) | 103.26(16) | 103.57(18) |
| O2-Ln2-O4                 | 91.34(16)  | 91.72(11)  | 91.49(15)  | 91.57(17)  |
| O2-Ln2-O6 <sup>ii</sup>   | 81.21(16)  | 80.66(11)  | 80.42(15)  | 80.31(17)  |
| O2-Ln2-O14                | 73.89(15)  | 74.02(10)  | 73.94(14)  | 73.67(16)  |
| O2-Ln2-O15                | 122.44(15) | 122.77(11) | 123.15(14) | 123.25(16) |
| O2-Ln2-O17                | 107.57(19) | 107.93(13) | 108.29(17) | 108.72(19) |
| O2-Ln2-O18                | 76.69(16)  | 77.09(11)  | 77.13(14)  | 77.88(17)  |
| O4-Ln2-O14                | 73.42(16)  | 73.62(11)  | 73.89(15)  | 74.09(16)  |
| O4-Ln2-O15                | 70.96(16)  | 70.87(11)  | 71.16(15)  | 71.00(16)  |
| O4-Ln2-O17                | 134.34(17) | 134.57(12) | 134.95(16) | 135.51(18) |
| O4-Ln2-O18                | 76.02(16)  | 76.16(11)  | 76.23(15)  | 76.17(17)  |
| O6 <sup>ii</sup> -Ln2-O4  | 155.51(18) | 155.63(12) | 155.24(16) | 154.56(17) |
| O6 <sup>ii</sup> -Ln2-O14 | 125.59(16) | 125.17(11) | 124.95(15) | 125.27(17) |
| O6 <sup>ii</sup> -Ln2-O15 | 132.41(17) | 132.44(11) | 132.57(15) | 133.30(17) |
| O6 <sup>ii</sup> -Ln2-O17 | 69.98(18)  | 69.61(12)  | 69.63(16)  | 69.67(19)  |
| O6 <sup>ii</sup> -Ln2-O18 | 79.56(17)  | 79.57(11)  | 79.16(15)  | 78.56(17)  |
| O12-Ln2-O2                | 151.66(17) | 152.15(11) | 152.59(15) | 153.34(17) |
| O12-Ln2-O4                | 84.18(16)  | 84.45(11)  | 84.87(15)  | 85.78(16)  |
| O12-Ln2-O6 <sup>ii</sup>  | 91.37(16)  | 91.55(11)  | 91.62(15)  | 90.81(17)  |
| O12-Ln2-O14               | 130.44(15) | 130.26(10) | 130.15(14) | 130.28(16) |
| O12-Ln2-O15               | 82.47(16)  | 81.97(11)  | 81.30(14)  | 80.85(16)  |
| O12-Ln2-O17               | 95.2(2)    | 93.98(14)  | 93.06(18)  | 91.3(2)    |
| O12-Ln2-O18               | 75.07(16)  | 75.21(11)  | 75.62(15)  | 75.73(17)  |
| O14-Ln2-O15               | 48.71(14)  | 48.91(10)  | 49.38(13)  | 49.79(15)  |
| O17-Ln2-O14               | 72.8(2)    | 73.28(14)  | 73.56(18)  | 74.5(2)    |
| O17-Ln2-O15               | 63.76(16)  | 63.99(11)  | 64.08(15)  | 64.72(17)  |
| O18-Ln2-O14               | 136.52(16) | 137.00(11) | 137.32(14) | 137.75(16) |
| O18-Ln2-O15               | 141.57(16) | 141.35(11) | 141.36(14) | 140.71(17) |
| O18-Ln2-O17               | 147.87(19) | 147.11(13) | 146.52(17) | 145.49(19) |

Symmetry codes: (i)  $x + 1, y, z$ ; (ii)  $x - 1, y, z$ ; (iii)  $-x + 1, -y + 2, -z + 1$ ; (iv)  $-x + 2, -y + 1, -z$ ; (v)  $-x + 2, -y + 2, -z + 1$ ; (vi)  $-x + 1, -y + 1, -z$ .

**Table S6** Hydrogens bond geometry (Å, °) for **2<sub>Ln</sub>**.

| [D–H···A]                   | <i>d</i> [D–H]        |                       |                       |                       | <i>d</i> [H···A]      |                       |                       |                       | <i>d</i> [D···A]      |                       |                       |                       | ∠[D–H···A]            |                       |                       |                       |
|-----------------------------|-----------------------|-----------------------|-----------------------|-----------------------|-----------------------|-----------------------|-----------------------|-----------------------|-----------------------|-----------------------|-----------------------|-----------------------|-----------------------|-----------------------|-----------------------|-----------------------|
|                             | <b>2<sub>Ce</sub></b> | <b>2<sub>Pr</sub></b> | <b>2<sub>Nd</sub></b> | <b>2<sub>Sm</sub></b> |
| O10–H10···O14               | 0.85(1)               | 0.85(1)               | 0.86(1)               | 0.86(1)               | 1.99(2)               | 1.98(1)               | 1.98(1)               | 2.04(3)               | 2.827(7)              | 2.830(5)              | 2.830(6)              | 2.870(7)              | 169(8)                | 175(4)                | 175(5)                | 163(8)                |
| O11–H11···O9 <sup>i</sup>   | 0.85(1)               | 0.85(1)               | 0.85(1)               | 0.86(1)               | 2.04(3)               | 2.00(2)               | 2.01(3)               | 2.01(3)               | 2.862(8)              | 2.832(5)              | 2.841(7)              | 2.833(8)              | 164(10)               | 165(7)                | 163(9)                | 163(9)                |
| O17–H17···O15 <sup>ii</sup> | 0.85(1)               | 0.85(1)               | 0.85(1)               | 0.86(1)               | 2.29(5)               | 2.33(3)               | 2.41(5)               | 2.55(6)               | 3.076(7)              | 3.120(5)              | 3.167(6)              | 3.237(7)              | 155(10)               | 155(5)                | 148(8)                | 138(8)                |
| O17–H17···O16 <sup>ii</sup> | 0.85(1)               | 0.85(1)               | 0.85(1)               | 0.86(1)               | 2.19(6)               | 2.19(5)               | 2.11(5)               | 2.01(3)               | 2.945(8)              | 2.911(6)              | 2.882(7)              | 2.844(8)              | 148(10)               | 142(7)                | 150(9)                | 164(10)               |
| O18–H18···O8 <sup>iii</sup> | 0.85(1)               | 0.85(1)               | 0.86(1)               | 0.86(1)               | 2.00(2)               | 1.99(1)               | 2.00(1)               | 2.02(2)               | 2.840(7)              | 2.838(5)              | 2.850(6)              | 2.867(7)              | 173(8)                | 177(5)                | 175(6)                | 171(7)                |

Symmetry codes: (i)  $-x + 2, -y + 1, -z + 1$ ; (ii)  $-x + 1, -y + 2, -z$ ; (iii)  $x - 1, y, z$ .

**Table S7** The Br···X halogen bond geometry (Å, °) for **2<sub>Ln</sub>**.

| [C–Br···X]                            | <i>d</i> [Br···X]     |                       |                       |                       | ∠[C–Br···X]           |                       |                       |                       |
|---------------------------------------|-----------------------|-----------------------|-----------------------|-----------------------|-----------------------|-----------------------|-----------------------|-----------------------|
|                                       | <b>2<sub>Ce</sub></b> | <b>2<sub>Pr</sub></b> | <b>2<sub>Nd</sub></b> | <b>2<sub>Sm</sub></b> | <b>2<sub>Ce</sub></b> | <b>2<sub>Pr</sub></b> | <b>2<sub>Nd</sub></b> | <b>2<sub>Sm</sub></b> |
| C3–Br1···O9 <sup>i</sup> (Type I)     | 3.134(5)              | 3.118(4)              | 3.113(5)              | 3.113(5)              | 149.1(2)              | 149.4(11)             | 150.3(16)             | 150.7(2)              |
| C3–Br1···Br7 <sup>ii</sup> (Type II)  | 3.745(9)              | 3.751(7)              | 3.759(9)              | 3.756(10)             | 121.4(19)             | 121.4(10)             | 121.0(15)             | 120.7(19)             |
| C4–Br2···Br7 <sup>ii</sup> (Type I)   | 3.681(10)             | 3.674(7)              | 3.670(9)              | 3.658(9)              | 124.2(18)             | 124.1(11)             | 124.3(14)             | 124.1(18)             |
| C4–Br2···Br8 <sup>ii</sup> (Type II)  | 3.731(9)              | 3.737(7)              | 3.743(8)              | 3.744(10)             | 175.7(2)              | 175.5(13)             | 175.8(18)             | 176.0(3)              |
| C7–Br3···Br6 <sup>i</sup> (Type I)    | 3.917(10)             | 3.904(7)              | 3.897(10)             | 3.878(1)              | 130.7(16)             | 130.9(9)              | 131.3(12)             | 131.2(17)             |
| C8–Br4···O13 <sup>iii</sup> (Type I)  | 3.683(5)              | 3.687(3)              | 3.694(4)              | 3.728(5)              | 91.1(2)               | 90.7(12)              | 90.5(16)              | 89.7(2)               |
| C11–Br5···Br1 <sup>iv</sup> (Type I)  | 3.816(13)             | 3.803(8)              | 3.800(12)             | 3.812(13)             | 127.1(2)              | 126.9(16)             | 126.6(2)              | 126.1(3)              |
| C12–Br6···Br2 <sup>iv</sup> (Type I)  | 3.783(14)             | 3.765(7)              | 3.759(13)             | 3.762(15)             | 123.5(2)              | 123.2(13)             | 123.1(15)             | 123.0(2)              |
| C17–Br7···Br1 <sup>ii</sup> (Type II) | 3.745(9)              | 3.751(7)              | 3.759(9)              | 3.756(10)             | 174.0(18)             | 174.9(12)             | 173.7(12)             | 173.7(2)              |
| C17–Br7···Br2 <sup>ii</sup> (Type I)  | 3.681(10)             | 3.737(7)              | 3.670(9)              | 3.658(9)              | 123.9(17)             | 121.7(10)             | 124.0(14)             | 123.7(18)             |
| C17–Br7···O8 <sup>v</sup> (Type I)    | 3.359(5)              | 3.358(3)              | 3.347(5)              | 3.355(5)              | 121.5(19)             | 121.1(12)             | 121.0(16)             | 120.4(2)              |
| C18–Br8···Br2 <sup>ii</sup> (Type II) | 3.731(9)              | 3.737(7)              | 3.743(8)              | 3.744(10)             | 122.1(19)             | 121.7(10)             | 121.4(14)             | 121.3(19)             |
| C18–Br8···O16 <sup>iv</sup> (Type I)  | 3.070(5)              | 3.066(4)              | 3.063(5)              | 3.056(5)              | 147.3(2)              | 148.0(12)             | 148.4(18)             | 148.5(2)              |

Symmetry code: (i)  $2 - x, 1 - y, 1 - z$ ; (ii)  $1 - x, 1 - y, 1 - z$ ; (iii)  $1 - x, 1 - y, -z$ ; (iv)  $1 + x, y, z$ ; (v)  $x - 1, y, z$ ; (vi)  $x, y - 1, z$ .



**Table S8** Selected bond lengths (Å) and bond angles (°) for **3<sub>Ln</sub>**.

|                                         | <b>3<sub>Gd</sub></b> | <b>3<sub>Tb</sub></b> | <b>3<sub>Dy</sub></b> |
|-----------------------------------------|-----------------------|-----------------------|-----------------------|
| Ln1–O1                                  | 2.272(3)              | 2.254(3)              | 2.249(5)              |
| Ln1–O2 <sup>i</sup>                     | 2.351(3)              | 2.339(2)              | 2.319(5)              |
| Ln1–O3 <sup>ii</sup>                    | 2.455(3)              | 2.440(3)              | 2.420(5)              |
| Ln1–O4 <sup>iii</sup>                   | 2.356(3)              | 2.341(2)              | 2.326(5)              |
| Ln1–O4 <sup>ii</sup>                    | 2.560(3)              | 2.556(2)              | 2.543(5)              |
| Ln1–O5                                  | 2.421(3)              | 2.403(3)              | 2.396(6)              |
| Ln1–O6                                  | 2.445(3)              | 2.436(3)              | 2.427(7)              |
| Ln1–O8                                  | 2.359(3)              | 2.347(3)              | 2.328(6)              |
| O1–Ln1–O2 <sup>i</sup>                  | 89.65(10)             | 89.17(9)              | 89.13(18)             |
| O1–Ln1–O3 <sup>ii</sup>                 | 75.42(10)             | 75.48(9)              | 75.01(18)             |
| O1–Ln1–O4 <sup>ii</sup>                 | 121.01(10)            | 121.26(9)             | 121.28(17)            |
| O1–Ln1–O4 <sup>iii</sup>                | 158.46(11)            | 158.35(10)            | 158.3(2)              |
| O1–Ln1–O5                               | 124.78(12)            | 125.12(11)            | 124.6(2)              |
| O1–Ln1–O6                               | 82.87(12)             | 82.41(12)             | 82.1(2)               |
| O1–Ln1–O8                               | 81.44(11)             | 81.45(11)             | 81.7(2)               |
| O2 <sup>i</sup> –Ln1–O3 <sup>ii</sup>   | 164.57(9)             | 164.14(9)             | 163.69(18)            |
| O2 <sup>i</sup> –Ln1–O4 <sup>iii</sup>  | 77.94(10)             | 77.99(8)              | 78.20(17)             |
| O2 <sup>i</sup> –Ln1–O4 <sup>ii</sup>   | 143.51(9)             | 143.68(8)             | 143.92(17)            |
| O2 <sup>i</sup> –Ln1–O5                 | 109.21(12)            | 109.05(11)            | 109.4(2)              |
| O2 <sup>i</sup> –Ln1–O6                 | 80.69(12)             | 80.54(12)             | 80.6(2)               |
| O2 <sup>i</sup> –Ln1–O8                 | 88.46(12)             | 88.46(11)             | 88.3(2)               |
| O3 <sup>ii</sup> –Ln1–O4 <sup>ii</sup>  | 51.45(9)              | 51.68(8)              | 51.85(17)             |
| O4 <sup>iii</sup> –Ln1–O3 <sup>ii</sup> | 117.46(9)             | 117.83(8)             | 118.06(17)            |
| O4 <sup>iii</sup> –Ln1–O4 <sup>ii</sup> | 66.53(11)             | 66.69(9)              | 66.63(19)             |
| O4 <sup>iii</sup> –Ln1–O5               | 76.34(11)             | 76.00(10)             | 76.6(2)               |
| O4 <sup>iii</sup> –Ln1–O6               | 111.88(12)            | 112.04(11)            | 112.5(2)              |
| O4 <sup>iii</sup> –Ln1–O8               | 80.70(11)             | 80.85(10)             | 80.5(2)               |
| O5–Ln1–O3 <sup>ii</sup>                 | 77.26(12)             | 77.65(11)             | 77.7(2)               |
| O5–Ln1–O4 <sup>ii</sup>                 | 71.08(10)             | 71.21(9)              | 70.95(19)             |
| O5–Ln1–O6                               | 52.04(10)             | 52.47(10)             | 52.5(2)               |
| O6–Ln1–O3 <sup>ii</sup>                 | 93.40(12)             | 93.30(12)             | 93.3(2)               |
| O6–Ln1–O4 <sup>ii</sup>                 | 119.46(10)            | 119.82(10)            | 119.59(19)            |
| O8–Ln1–O3 <sup>ii</sup>                 | 93.04(12)             | 93.07(11)             | 93.0(2)               |
| O8–Ln1–O4 <sup>ii</sup>                 | 78.21(10)             | 78.15(9)              | 78.49(19)             |
| O8–Ln1–O5                               | 147.02(10)            | 146.97(10)            | 147.1(2)              |
| O8–Ln1–O6                               | 160.94(11)            | 160.56(10)            | 160.4(2)              |

Symmetry codes: (i)  $-x + 1, -y + 1, -z + 2$ ; (ii)  $-x + 1, -y, -z + 1$ ; (iii)  $x, y, z + 1$ ; (iv)  $x, y, z - 1$ .

**Table S9** Hydrogen bond geometry (Å, °) for **3<sub>Ln</sub>**.

| [D–H···A]                | <i>d</i> [D–H]        |                       |                       | <i>d</i> [H···A]      |                       |                       | <i>d</i> [D···A]      |                       |                       | ∠[D–H···A]            |                       |                       |
|--------------------------|-----------------------|-----------------------|-----------------------|-----------------------|-----------------------|-----------------------|-----------------------|-----------------------|-----------------------|-----------------------|-----------------------|-----------------------|
|                          | <b>3<sub>Gd</sub></b> | <b>3<sub>Tb</sub></b> | <b>3<sub>Dy</sub></b> |
| O8–H8···O5 <sup>i</sup>  | 0.85(1)               | 0.85(1)               | 0.86(1)               | 2.03(2)               | 2.01(2)               | 2.01(4)               | 2.789(4)              | 2.772(4)              | 2.763(8)              | 148(3)                | 149(3)                | 146(6)                |
| O8–H8···O7 <sup>ii</sup> | 0.85(1)               | 0.85(1)               | 0.86(1)               | 2.58(3)               | 2.62(3)               | 2.60(5)               | 3.158(5)              | 3.182(5)              | 3.197(10)             | 126(3)                | 125(3)                | 128(6)                |

Symmetry codes: (i)  $-x + 1, -y, -z + 2$ ; (ii)  $x + 1, y, z$ .**Table S10** The Br···X halogen bond geometry (Å, °) in **3<sub>Ln</sub>**.

| [C–Br···X]                            | <i>d</i> [Br···X]     |                       |                       | ∠[C–Br···X]           |                       |                       |
|---------------------------------------|-----------------------|-----------------------|-----------------------|-----------------------|-----------------------|-----------------------|
|                                       | <b>3<sub>Gd</sub></b> | <b>3<sub>Tb</sub></b> | <b>3<sub>Dy</sub></b> | <b>3<sub>Gd</sub></b> | <b>3<sub>Tb</sub></b> | <b>3<sub>Dy</sub></b> |
| C3–Br1···Br3 <sup>i</sup> (type I)    | 3.876(10)             | 3.872(6)              | 3.867(13)             | 120.8(12)             | 120.9(11)             | 120.4(2)              |
| C3–Br1···Br4 <sup>i</sup> (type II)   | 3.923(11)             | 3.922(8)              | 3.916(15)             | 159.8(15)             | 159.8(13)             | 159.2(3)              |
| C4–Br2···Br3 <sup>i</sup> (type II)   | 3.900(10)             | 3.902(7)              | 3.895(14)             | 119.7(13)             | 119.7(12)             | 119.7(2)              |
| C4–Br2···O7 <sup>ii</sup> (type I)    | 3.034(4)              | 3.032(4)              | 3.017(7)              | 163.7(16)             | 164.0(15)             | 163.9(3)              |
| C7–Br3···Br1 <sup>iii</sup> (type I)  | 3.876(10)             | 3.872(6)              | 3.867(13)             | 121.1(19)             | 121.2(11)             | 121.2(2)              |
| C7–Br3···Br2 <sup>iii</sup> (type II) | 3.900(10)             | 3.902(7)              | 3.895(14)             | 162.5(12)             | 162.3(13)             | 162.3(3)              |
| C8–Br4···Br1 <sup>iii</sup> (type I)  | 3.923(11)             | 3.922(8)              | 3.916(15)             | 119.6(13)             | 119.7(12)             | 119.5(2)              |

Symmetry code: (i)  $-1 + x, y, z$ ; (ii)  $-x, -y, 1 - z$ ; (iii)  $1 + x, y, z$ .

**Table S11** Selected bond lengths (Å) and bond angles (°) for **4<sub>Ln</sub>**.

|                                       | <b>4<sub>Gd</sub></b> | <b>4<sub>Tb</sub></b> | <b>4<sub>Dy</sub></b> |
|---------------------------------------|-----------------------|-----------------------|-----------------------|
| Ln1–O1                                | 2.287(4)              | 2.279(4)              | 2.259(6)              |
| Ln1–O4 <sup>i</sup>                   | 2.310(4)              | 2.289(4)              | 2.265(5)              |
| Ln1–O5                                | 2.267(4)              | 2.246(4)              | 2.230(5)              |
| Ln1–O7 <sup>ii</sup>                  | 2.311(4)              | 2.290(4)              | 2.281(6)              |
| Ln1–O9                                | 2.247(4)              | 2.227(4)              | 2.206(6)              |
| Ln1–O11                               | 2.243(4)              | 2.226(4)              | 2.205(6)              |
| Ln2–O2 <sup>iii</sup>                 | 2.358(4)              | 2.344(4)              | 2.326(6)              |
| Ln2–O3                                | 2.326(4)              | 2.307(4)              | 2.293(6)              |
| Ln2–O8 <sup>iv</sup>                  | 2.315(4)              | 2.305(4)              | 2.278(6)              |
| Ln2–O13                               | 2.455(7)              | 2.441(7)              | 2.428(9)              |
| Ln2–O14                               | 2.445(5)              | 2.431(5)              | 2.425(7)              |
| Ln2–O15                               | 2.334(5)              | 2.335(5)              | 2.301(7)              |
| Ln2–O16                               | 2.447(5)              | 2.429(5)              | 2.415(7)              |
| Ln2–O17                               | 2.487(7)              | 2.469(7)              | 2.454(8)              |
| Ln2–O18                               | 2.356(11)             | 2.350(11)             | 2.310(12)             |
| O1–Ln1–O4 <sup>i</sup>                | 91.91(16)             | 91.39(16)             | 91.7(2)               |
| O1–Ln1–O7 <sup>ii</sup>               | 86.52(16)             | 86.18(16)             | 86.7(2)               |
| O4 <sup>i</sup> –Ln1–O7 <sup>ii</sup> | 89.15(15)             | 88.81(15)             | 89.4(2)               |
| O5–Ln1–O1                             | 86.49(16)             | 86.93(17)             | 86.5(2)               |
| O5–Ln1–O4 <sup>i</sup>                | 88.19(16)             | 88.33(16)             | 87.8(2)               |
| O5–Ln1–O7 <sup>ii</sup>               | 172.43(16)            | 172.48(16)            | 172.6(2)              |
| O9–Ln1–O1                             | 90.42(17)             | 90.78(16)             | 90.6(2)               |
| O9–Ln1–O4 <sup>i</sup>                | 176.83(15)            | 177.00(15)            | 177.1(2)              |
| O9–Ln1–O5                             | 94.11(16)             | 93.85(16)             | 94.1(2)               |
| O9–Ln1–O7 <sup>ii</sup>               | 88.85(15)             | 89.27(16)             | 89.0(2)               |
| O11–Ln1–O1                            | 177.73(15)            | 177.82(16)            | 178.0(2)              |
| O11–Ln1–O4 <sup>i</sup>               | 87.53(15)             | 88.02(15)             | 87.6(2)               |
| O11–Ln1–O5                            | 95.69(16)             | 95.15(17)             | 95.4(2)               |
| O11–Ln1–O7 <sup>ii</sup>              | 91.27(16)             | 91.70(16)             | 91.4(2)               |
| O11–Ln1–O9                            | 90.06(16)             | 89.74(16)             | 90.0(2)               |
| O2 <sup>iii</sup> –Ln2–O13            | 146.9(3)              | 146.9(3)              | 147.6(4)              |
| O2 <sup>iii</sup> –Ln2–O14            | 143.57(18)            | 143.62(18)            | 143.2(3)              |
| O2 <sup>iii</sup> –Ln2–O16            | 73.07(16)             | 73.21(16)             | 73.1(2)               |
| O2 <sup>iii</sup> –Ln2–O17            | 77.1(3)               | 77.4(4)               | 76.5(5)               |
| O3–Ln2–O2 <sup>iii</sup>              | 85.79(15)             | 85.18(15)             | 85.5(2)               |
| O3–Ln2–O13                            | 70.8(3)               | 71.2(3)               | 70.7(4)               |
| O3–Ln2–O14                            | 117.0(2)              | 117.6(2)              | 117.9(3)              |
| O3–Ln2–O15                            | 136.73(17)            | 136.93(16)            | 136.6(2)              |
| O3–Ln2–O16                            | 151.38(15)            | 150.70(15)            | 150.8(2)              |
| O3–Ln2–O17                            | 74.6(4)               | 75.4(4)               | 74.6(5)               |

|                                         |            |            |           |
|-----------------------------------------|------------|------------|-----------|
| O3-Ln2-O18                              | 80.4(11)   | 78.6(12)   | 80.0(17)  |
| O8 <sup>iv</sup> -Ln2-O2 <sup>iii</sup> | 83.44(15)  | 83.06(16)  | 83.6(2)   |
| O8 <sup>iv</sup> -Ln2-O3                | 82.49(15)  | 81.67(15)  | 81.8(2)   |
| O8 <sup>iv</sup> -Ln2-O13               | 115.0(3)   | 114.9(4)   | 113.2(5)  |
| O8 <sup>iv</sup> -Ln2-O14               | 72.82(17)  | 73.58(17)  | 73.2(2)   |
| O8 <sup>iv</sup> -Ln2-O15               | 137.34(17) | 138.27(16) | 138.1(2)  |
| O8 <sup>iv</sup> -Ln2-O16               | 76.24(18)  | 76.38(17)  | 76.3(2)   |
| O8 <sup>iv</sup> -Ln2-O17               | 150.8(4)   | 150.9(4)   | 150.1(5)  |
| O8 <sup>iv</sup> -Ln2-O18               | 149.5(12)  | 148.4(14)  | 150.0(19) |
| O14-Ln2-O13                             | 69.4(3)    | 69.4(3)    | 69.2(4)   |
| O14-Ln2-O16                             | 74.7(2)    | 74.4(2)    | 73.9(3)   |
| O14-Ln2-O17                             | 134.1(4)   | 133.3(4)   | 134.6(5)  |
| O15-Ln2-O2 <sup>iii</sup>               | 110.4(2)   | 110.4(2)   | 110.5(3)  |
| O15-Ln2-O13                             | 75.4(3)    | 75.6(4)    | 76.2(5)   |
| O15-Ln2-O14                             | 73.3(2)    | 73.4(2)    | 73.0(3)   |
| O15-Ln2-O16                             | 70.37(18)  | 70.75(17)  | 71.1(3)   |
| O15-Ln2-O17                             | 70.8(4)    | 69.7(4)    | 70.8(5)   |
| O15-Ln2-O18                             | 69.1(13)   | 70.0(14)   | 68.6(19)  |
| O16-Ln2-O13                             | 135.9(3)   | 136.1(3)   | 136.2(4)  |
| O16-Ln2-O17                             | 117.5(3)   | 117.3(3)   | 117.6(4)  |
| O18-Ln2-O2 <sup>iii</sup>               | 70.3(9)    | 71.0(11)   | 71.4(15)  |
| O18-Ln2-O13                             | 82.7(8)    | 81.5(9)    | 82.8(13)  |
| O18-Ln2-O14                             | 137.7(12)  | 137.7(13)  | 136.7(19) |
| O18-Ln2-O16                             | 109.2(8)   | 111.4(9)   | 110.5(13) |

Symmetry codes: (i)  $-x + 1/2, y + 1/2, -z + 3/2$ ; (ii)  $x - 1/2, -y + 3/2, z - 1/2$ ; (iii)  $-x + 1/2, y - 1/2, -z + 3/2$ ; (iv)  $-x + 1, -y + 1, -z + 2$ ; (v)  $-x + 1, -y + 1, -z + 1$ ; (vi)  $-x + 1, -y + 2, -z + 1$ ; (vii)  $x + 1/2, -y + 3/2, z + 1/2$ .

**Table S12** Hydrogen bond geometry (Å, °) in **4<sub>Ln</sub>**.

| [D–H···A]                   | <i>d</i> [D–H]        |                       |                       | <i>d</i> [H···A]      |                       |                       | <i>d</i> [D···A]      |                       |                       | ∠[D–H···A]            |                       |                       |
|-----------------------------|-----------------------|-----------------------|-----------------------|-----------------------|-----------------------|-----------------------|-----------------------|-----------------------|-----------------------|-----------------------|-----------------------|-----------------------|
|                             | <b>4<sub>Gd</sub></b> | <b>4<sub>Tb</sub></b> | <b>4<sub>Dy</sub></b> |
| O13–H13···O12 <sup>i</sup>  | 0.85(1)               | 0.86(1)               | 0.85(1)               | 1.92(7)               | 1.84(3)               | 2.03(13)              | 2.655(10)             | 2.660(11)             | 2.653(16)             | 143(10)               | 160(7)                | 129(14)               |
| O13A–H13A···O6 <sup>i</sup> | 0.85(1)               | 0.85(1)               | 0.85(1)               | 2.33(3)               | 2.39(8)               | 2.49(16)              | 3.09(3)               | 3.14(2)               | 3.14(3)               | 150(2)                | 147(11)               | 134(19)               |
| O14–H14···O12 <sup>i</sup>  | 0.85(1)               | 0.86(1)               | 0.86(1)               | 1.92(2)               | 1.92(2)               | 1.92(3)               | 2.733(7)              | 2.731(7)              | 2.732(10)             | 158(6)                | 157(6)                | 158(7)                |
| O15–H15B···O6 <sup>i</sup>  | 0.85(2)               | 0.85(2)               | 0.84(2)               | 1.82(3)               | 1.86(4)               | 1.85(4)               | 2.643(7)              | 2.647(7)              | 2.653(10)             | 163(6)                | 154(9)                | 162(11)               |
| O16–H16B···O10 <sup>i</sup> | 0.86(2)               | 0.86(2)               | 0.85(2)               | 1.95(3)               | 1.99(3)               | 2.03(5)               | 2.740(7)              | 2.777(6)              | 2.771(9)              | 151(4)                | 151(4)                | 146(8)                |

Symmetry codes: (i)  $-x + 3/2, y - 1/2, -z + 3/2$ .**Table S13** The Br···X halogen bond geometry (Å, °) in **4<sub>Ln</sub>**.

| [C–Br···X]                              | <i>d</i> [Br···X]     |                       |                       | ∠[C–Br···X]           |                       |                       |
|-----------------------------------------|-----------------------|-----------------------|-----------------------|-----------------------|-----------------------|-----------------------|
|                                         | <b>4<sub>Gd</sub></b> | <b>4<sub>Tb</sub></b> | <b>4<sub>Dy</sub></b> | <b>4<sub>Gd</sub></b> | <b>4<sub>Tb</sub></b> | <b>4<sub>Dy</sub></b> |
| C3–Br1···Br3 <sup>i</sup> (type II)     | 3.538(15)             | 3.508(16)             | 3.492(16)             | 130.6(19)             | 130.3(19)             | 130.2(3)              |
| C3–Br1···Br11 <sup>ii</sup> (type I)    | 3.851(19)             | 3.872(2)              | 3.858(2)              | 80.4(19)              | 80.5(19)              | 80.9(3)               |
| C4–Br2···Br7 <sup>iii</sup> (type II)   | 3.622(14)             | 3.601(16)             | 3.581(16)             | 128.25(17)            | 128.3(17)             | 128.7(2)              |
| C4–Br2···O12 <sup>iv</sup> (type I)     | 3.696(5)              | 3.712(5)              | 3.717(7)              | 125.57(19)            | 125.76(19)            | 125.9(3)              |
| C6–Br3···Br1 <sup>v</sup> (type II)     | 3.538(15)             | 3.508(16)             | 3.492(16)             | 171.81(18)            | 171.5(18)             | 171.7(3)              |
| C7–Br4···Br6 <sup>vi</sup> (type II)    | 3.434(16)             | 3.409(2)              | 3.406(15)             | 169.1(17)             | 168.5(17)             | 169.6(2)              |
| C11–Br5···Br12 <sup>vii</sup> (type II) | 3.567(17)             | 3.543(2)              | 3.541(16)             | 124.7(2)              | 124.5(2)              | 124.8(2)              |
| C12–Br6···Br4 <sup>viii</sup> (type II) | 3.434(16)             | 3.409(2)              | 3.406(15)             | 131.9(18)             | 132.2(18)             | 132.2(2)              |
| C14–Br7···Br2 <sup>iii</sup> (type II)  | 3.622(14)             | 3.601(16)             | 3.581(16)             | 164.9(2)              | 164.2(2)              | 164.5(3)              |
| C19–Br9···Br11 (type II)                | 3.719(16)             | 3.682(18)             | 3.660(17)             | 164.8(18)             | 165.1(18)             | 165.0(3)              |
| C20–Br10···Br5 <sup>vi</sup> (type I)   | 3.849(2)              | 3.865(2)              | 3.844(2)              | 107.9(2)              | 107.3(19)             | 107.4(3)              |

Symmetry code: (i)  $1/2 - x, 1/2 + y, 3/2 - z$ ; (ii)  $-1/2 + x, 3/2 - y, 1/2 + z$ ; (iii)  $1 - x, 1 - y, 2 - z$ ; (iv)  $-1/2 + x, 3/2 - y, 1/2 - z$ ; (v)  $1/2 - x, -1/2 + y, 3/2 - z$ ; (vi)  $-1/2 + x, 3/2 - y, -1/2 + z$ ; (vii)  $1 - x, 2 - y, 1 - z$ ; (viii)  $1/2 + x, 3/2 - y, 1/2 + z$ .

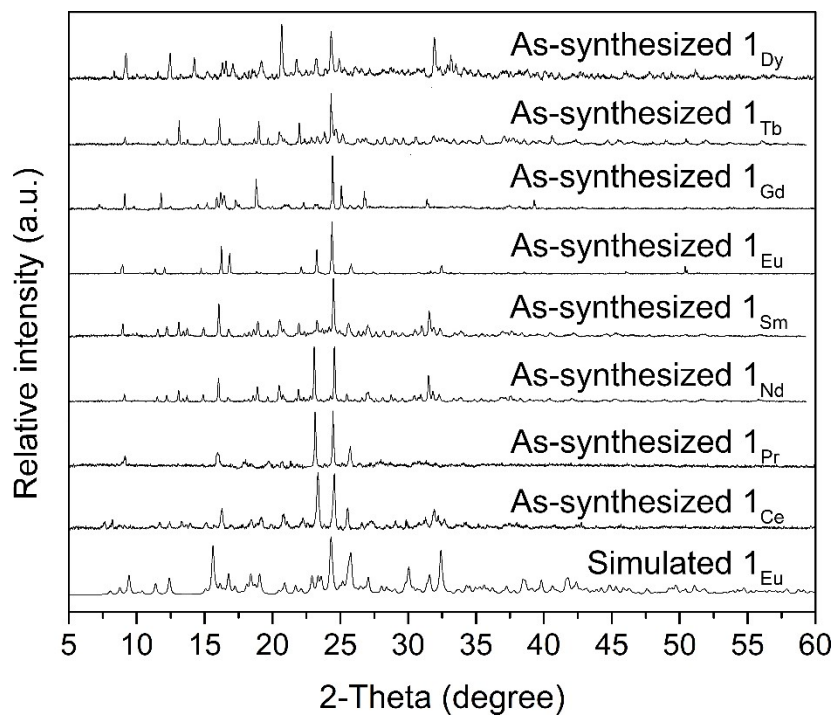

(a)

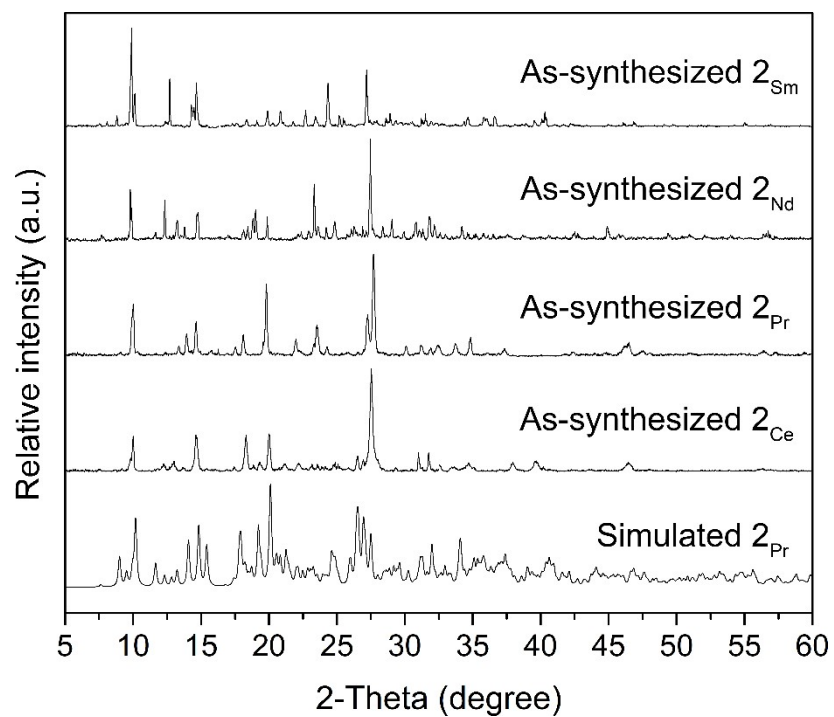

(b)

**Figure S1.** Comparison of the simulated and as-synthesized PXRD patterns of compounds in series  $1_{Ln}$  (a),  $2_{Ln}$  (b),  $3_{Ln}$  (c), and  $4_{Ln}$  (d).

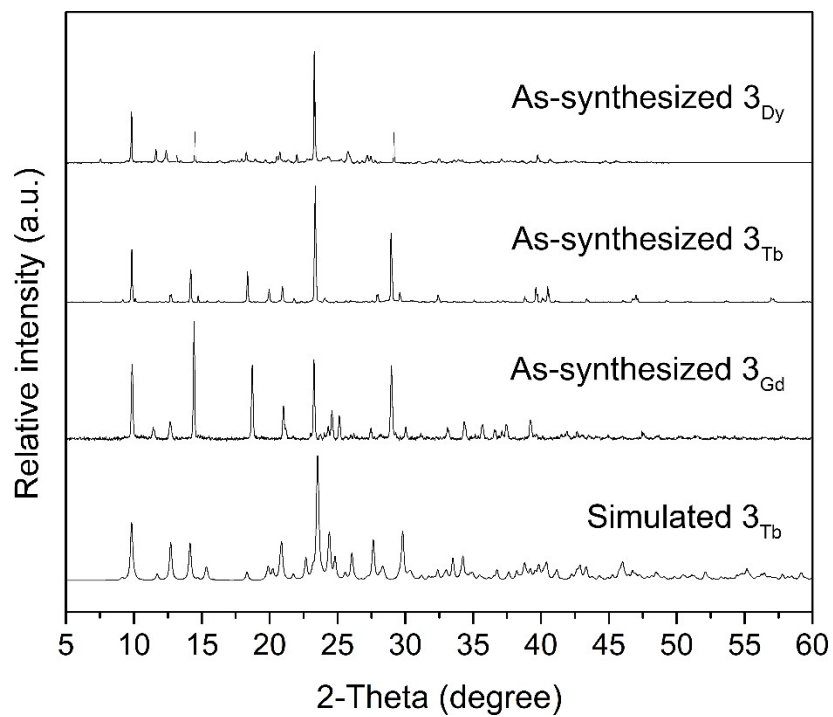

(c)

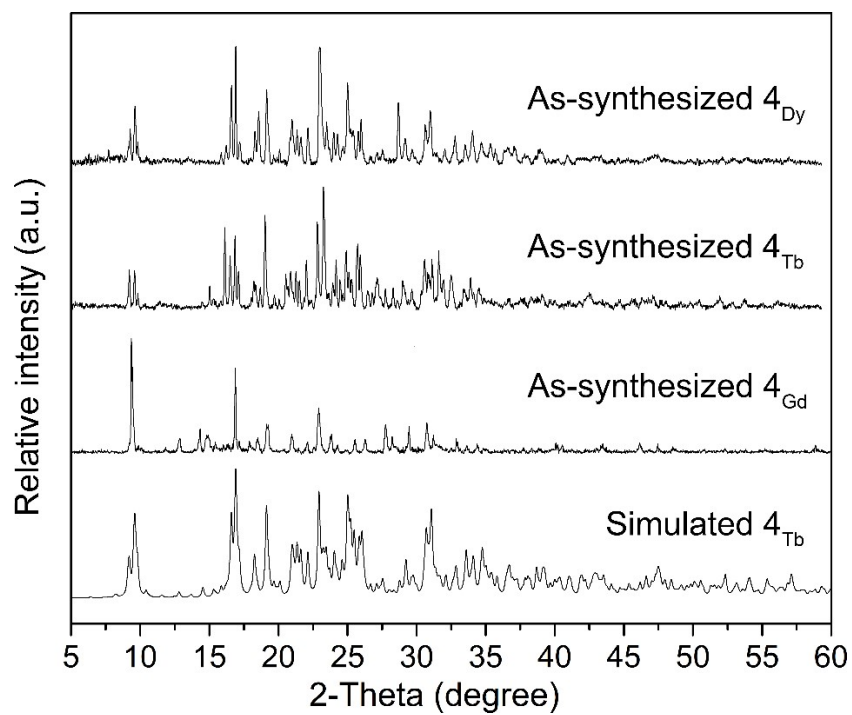

(d)

**Figure S1.** (Continued).

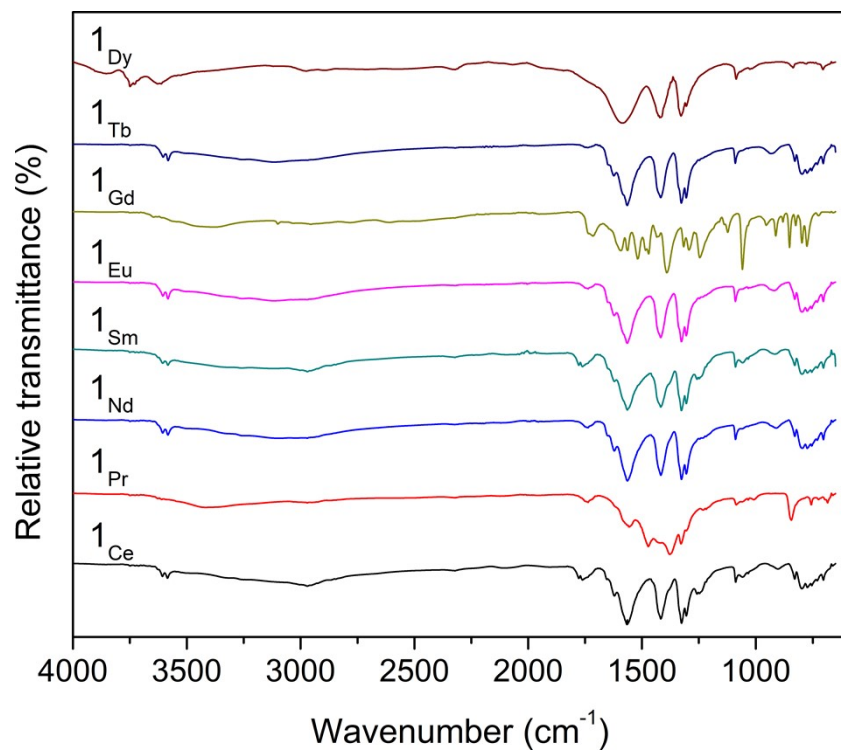

(a)

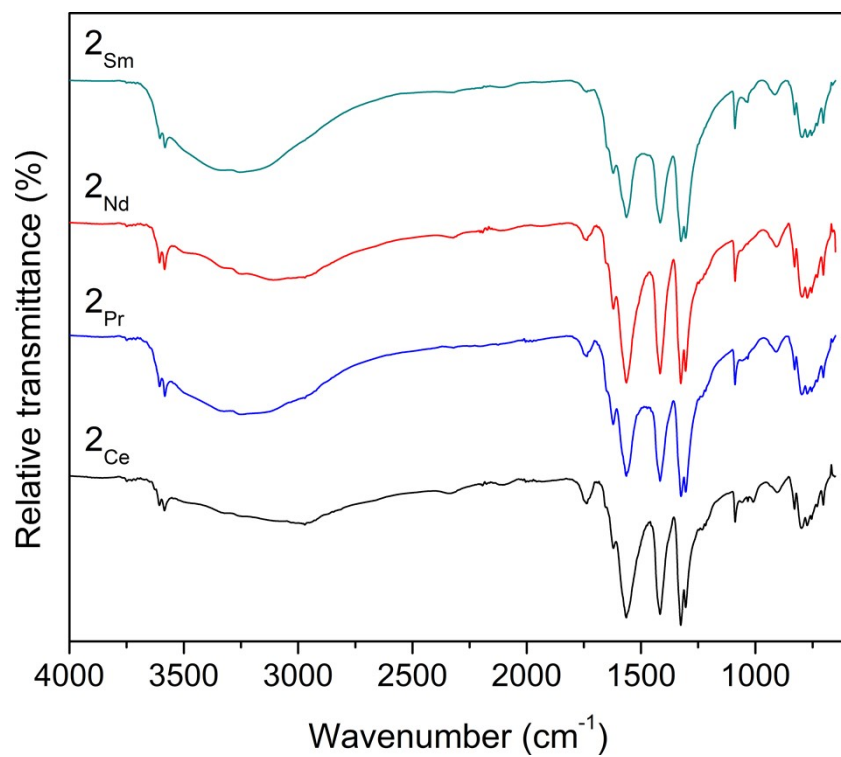

(b)

Figure S2. FT-IR spectra of compounds in series  $1_{Ln}$  (a),  $2_{Ln}$  (b),  $3_{Ln}$  (c), and  $4_{Ln}$  (d).



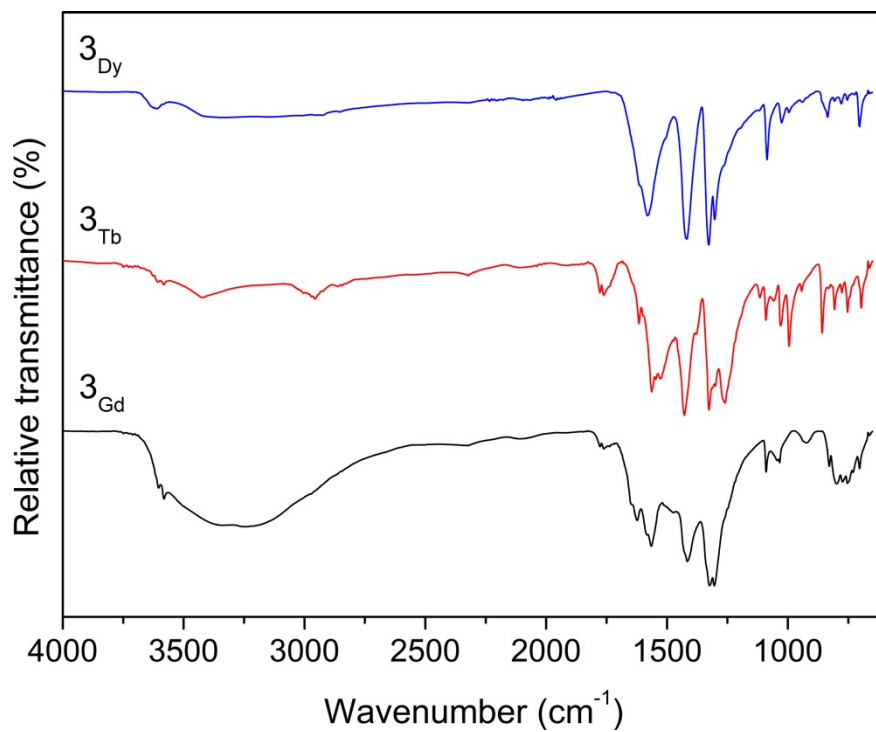

(c)

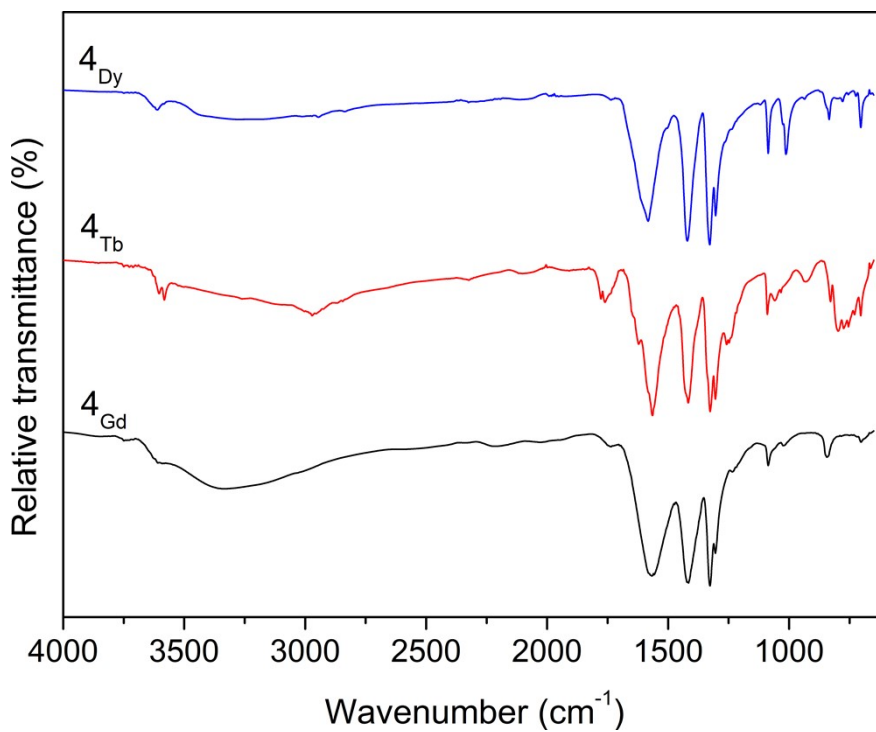

(d)

Figure S2. (Continued).

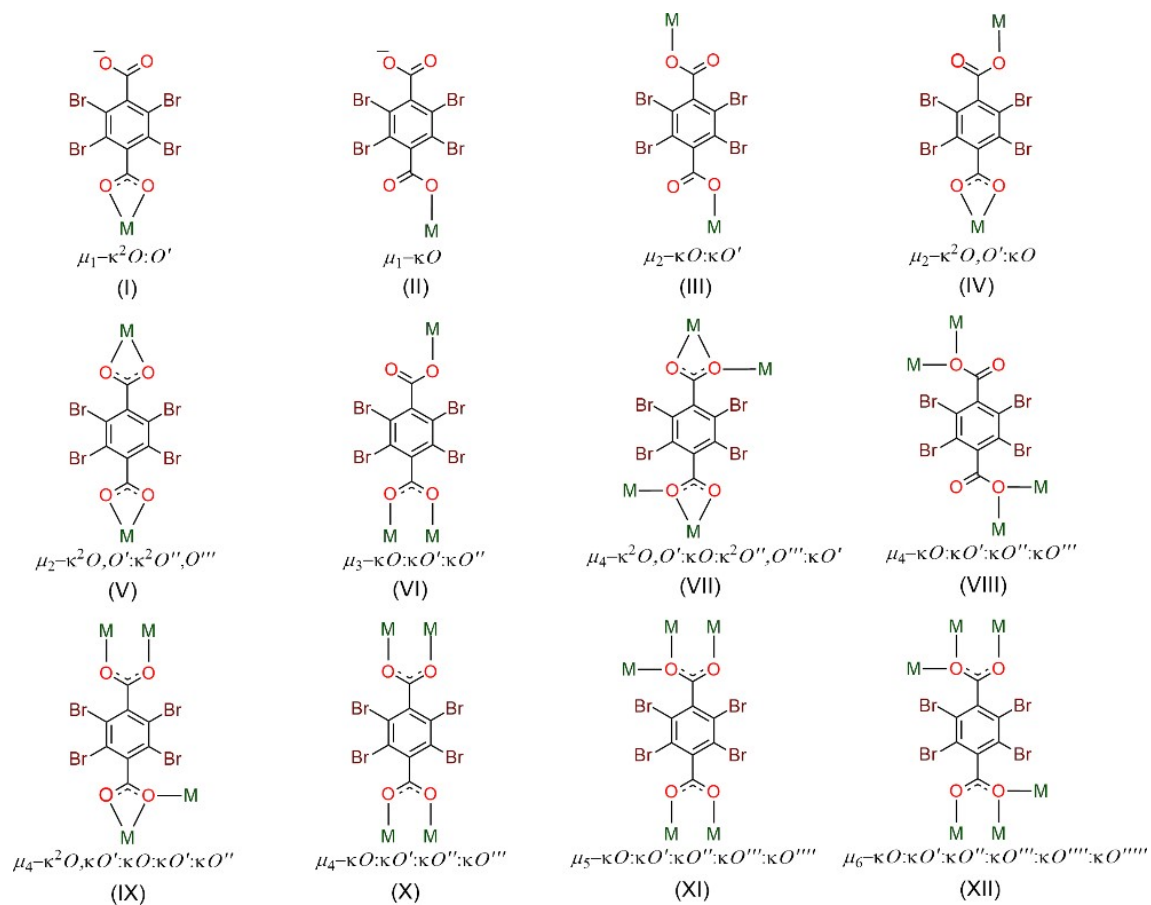

**Figure S3.** Coordination modes of the  $\text{Br}_4\text{bdc}^{2-}$  ligand observed in previous reports and the present study.

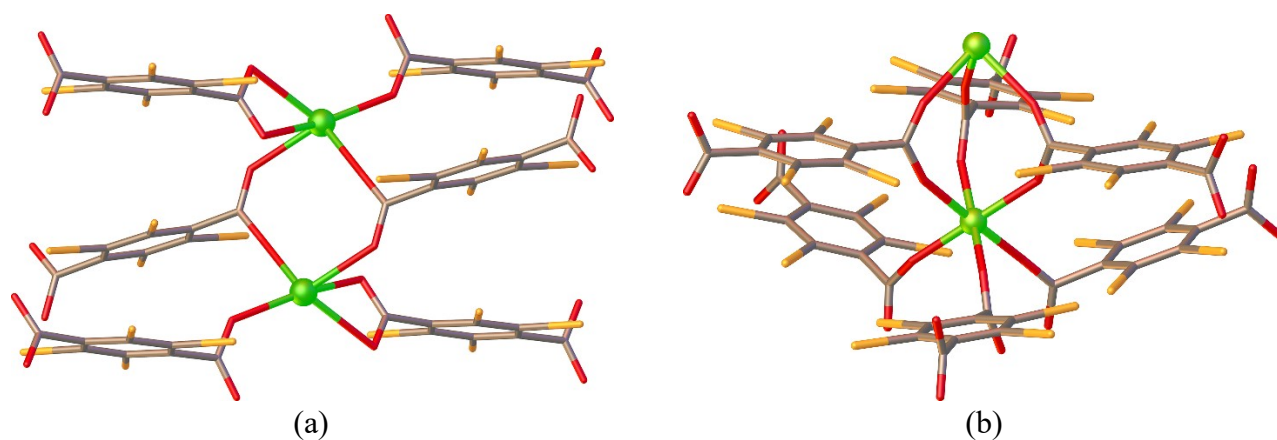

**Figure S4.** Secondary building unit (SBU) of  $1_{\text{Eu}}$  (a) and  $4_{\text{Tb}}$  (b). The coordinated  $\text{H}_2\text{O}$  and  $\text{MeOH}$  molecules are not shown for clarity.

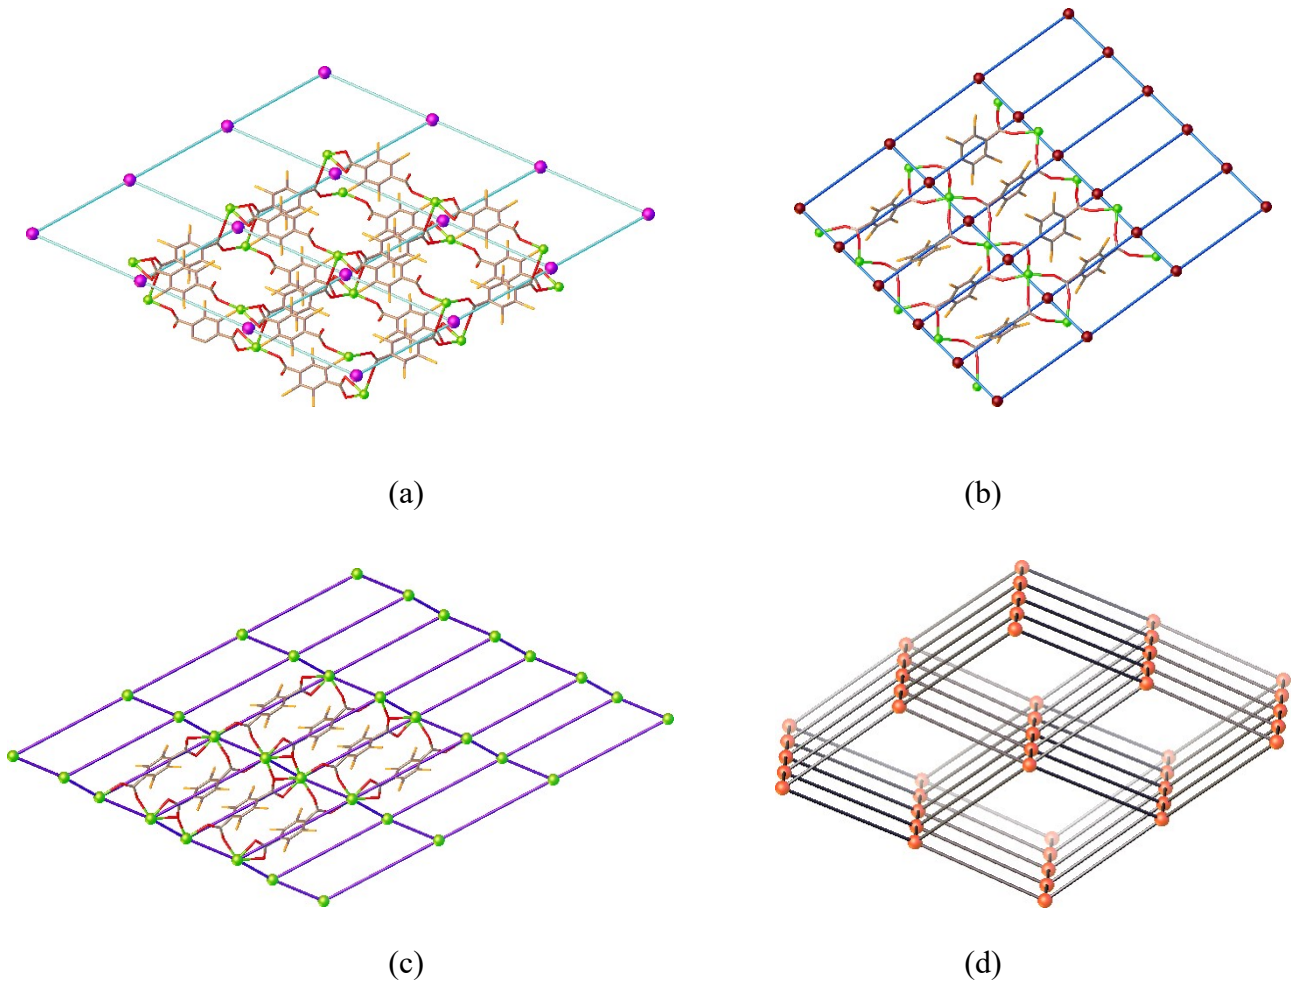

**Figure S5.** Topological representation of the *sql* net in  $\mathbf{1}_{Eu}$  (a),  $\mathbf{2}_{Pr}$  (b), and  $\mathbf{3}_{Tb}$  (c), and the *pcu*  $\alpha$ -Po net in  $\mathbf{4}_{Ln}$  (d).

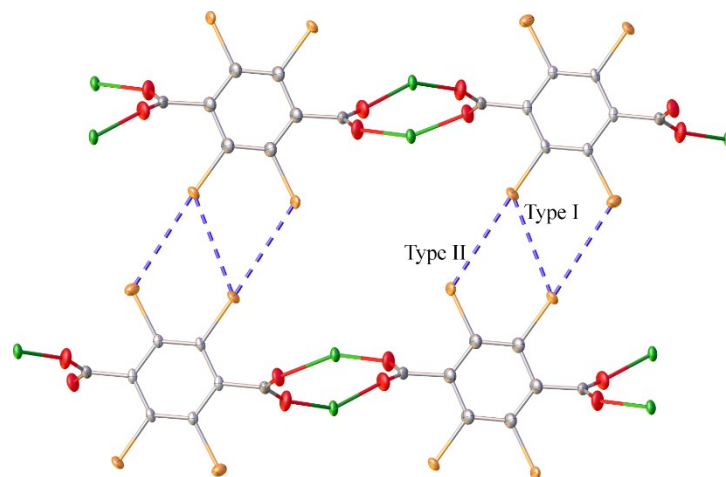

**Figure S6.** Partial view of types I and II Br $\cdots$ Br halogen bonds in **2Pr**.

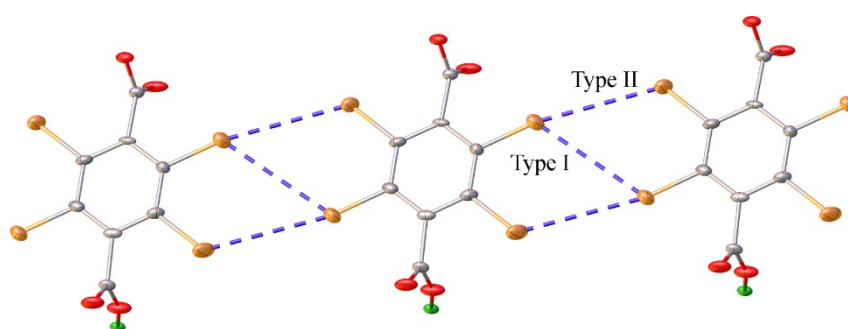

**Figure S7.** Partial view of types I and II Br $\cdots$ Br halogen bonds in **3Tb**.

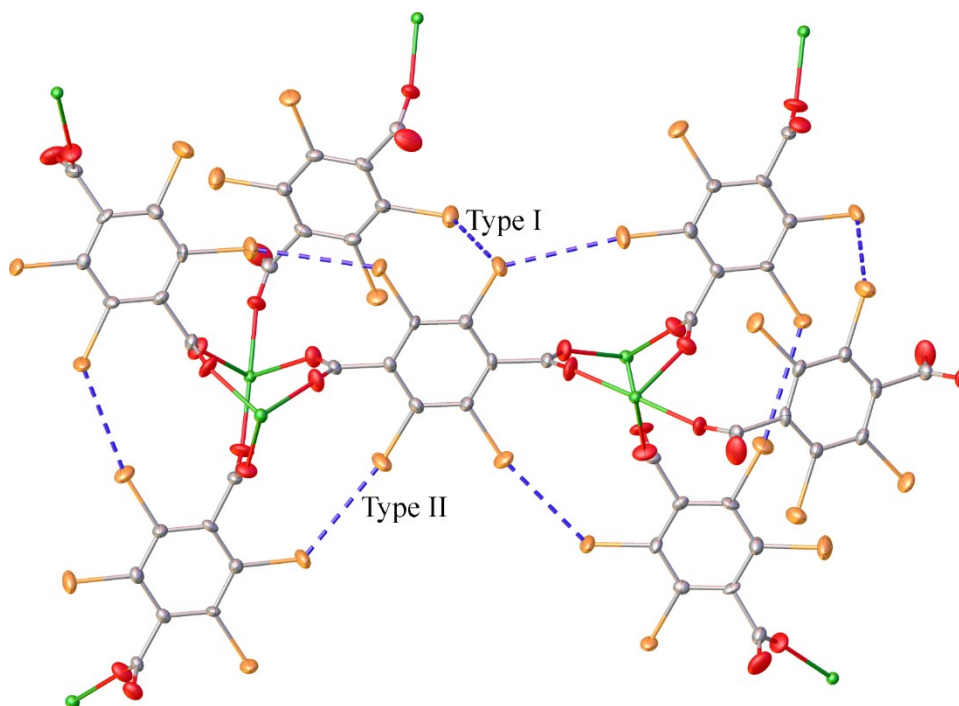

**Figure S8.** Partial view of types I and II Br $\cdots$ Br halogen bonds in **4Tb**.

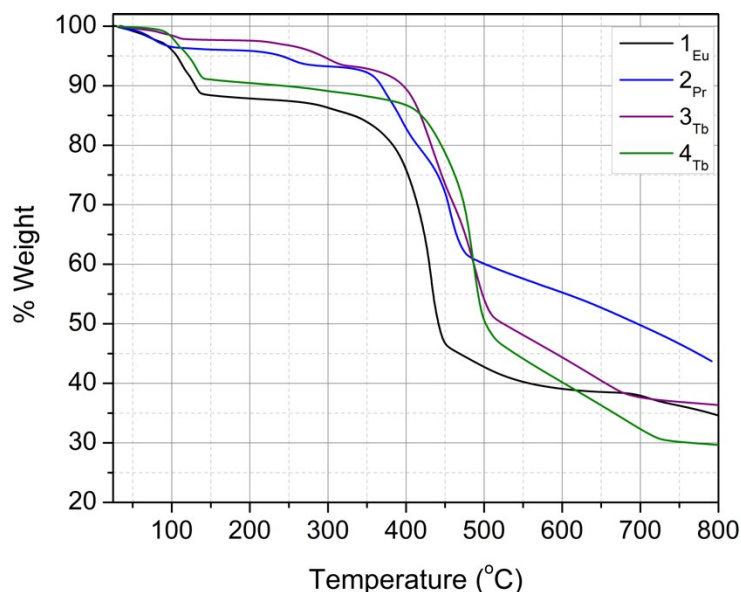

**Figure S9.** TGA curves of **1<sub>Eu</sub>** (back line), **2<sub>Pr</sub>** (blue line), **3<sub>Tb</sub>** (purple line), and **4<sub>Tb</sub>** (green line).

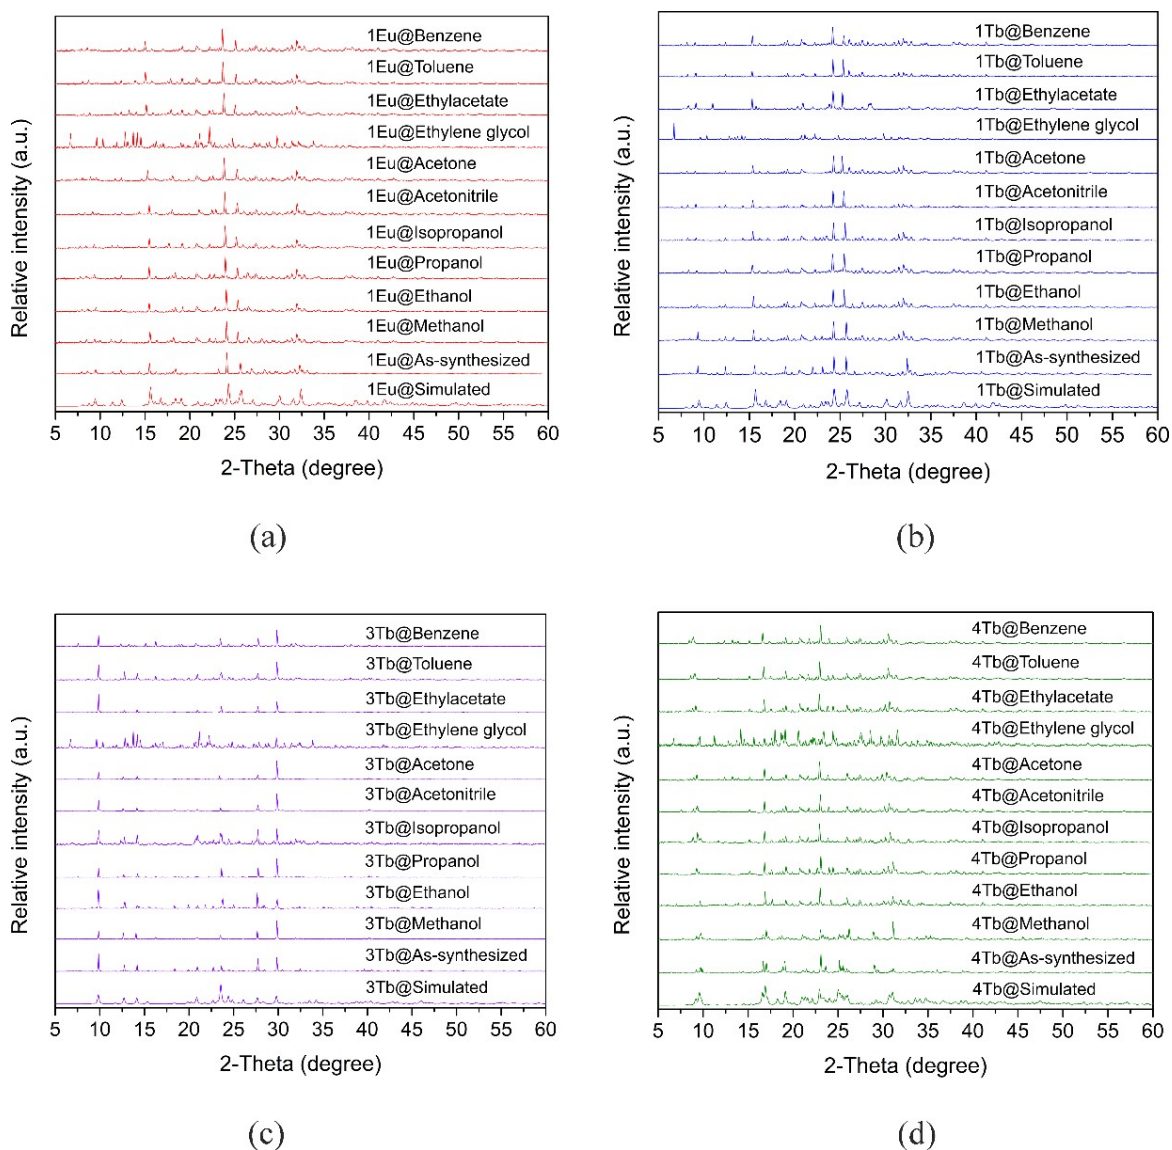

**Figure S10.** PXRD patterns of **1<sub>Eu</sub>** (a), **1<sub>Tb</sub>** (b), **3<sub>Tb</sub>** (c), and **4<sub>Tb</sub>** (d) after soaking in different solvents for 24 h.

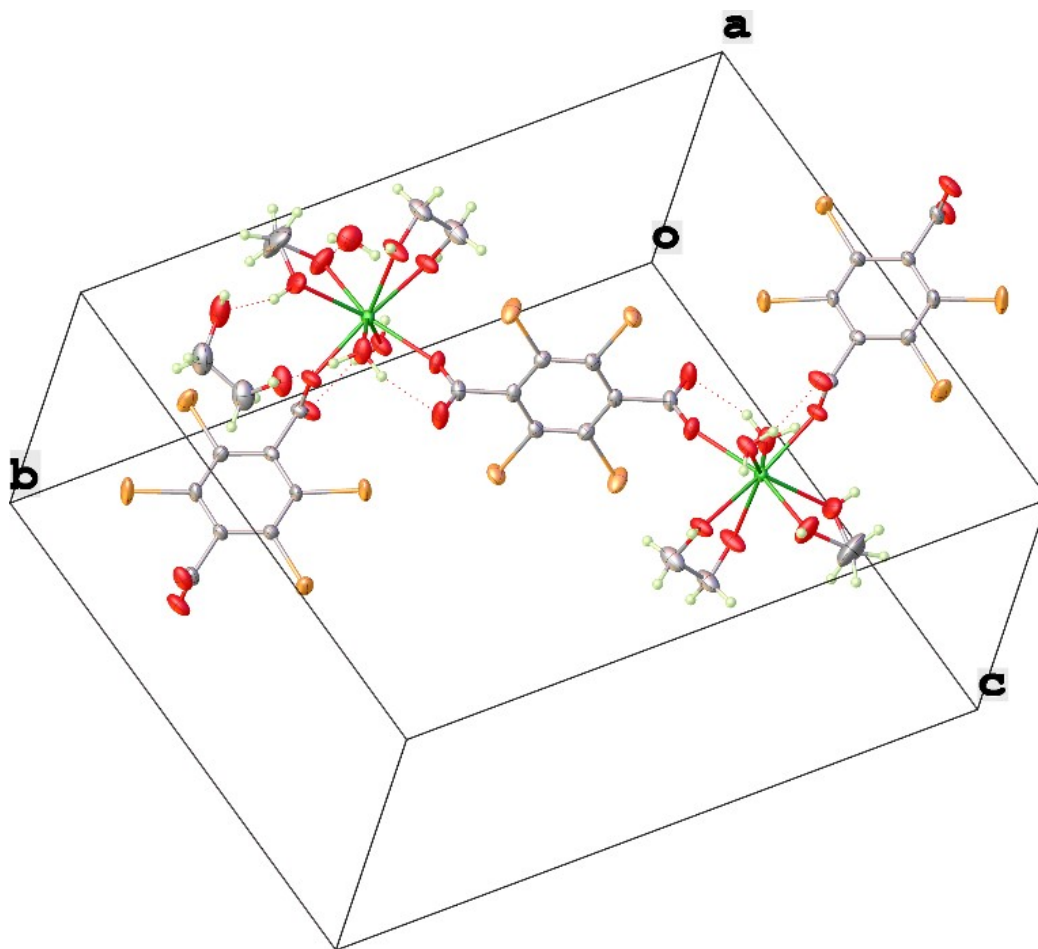

|                 |                                                                                  |              |             |                                                                         |                |
|-----------------|----------------------------------------------------------------------------------|--------------|-------------|-------------------------------------------------------------------------|----------------|
| CCDC no.        | 2130102                                                                          | $a$ (Å)      | 8.62280(10) | $V$ (Å <sup>3</sup> )                                                   | 3157.09(9)     |
| Formula         | C <sub>36</sub> H <sub>48</sub> Br <sub>12</sub> O <sub>30</sub> Tb <sub>2</sub> | $b$ (Å)      | 22.3036(4)  | $Z$                                                                     | 2              |
| Formula weigh   | 2237.50                                                                          | $c$ (Å)      | 16.5045(3)  | $\rho_{\text{calcd}}$ (g cm <sup>-3</sup> )                             | 2.354          |
| Temperature (K) | 296                                                                              | $\alpha$ (°) | 90          | GOF on $F^2, S$                                                         | 1.022          |
| Crystal system  | Monoclinic                                                                       | $\beta$ (°)  | 95.9410(10) | $R_1, wR_2[I > 2\sigma(I)]$                                             | 0.0235, 0.0505 |
| Space group     | $P2_1/c$                                                                         | $\gamma$ (°) | 90          | $\Delta\rho_{\text{max}}, \Delta\rho_{\text{min}}$ (e Å <sup>-3</sup> ) | 1.43, -1.13    |

(a)

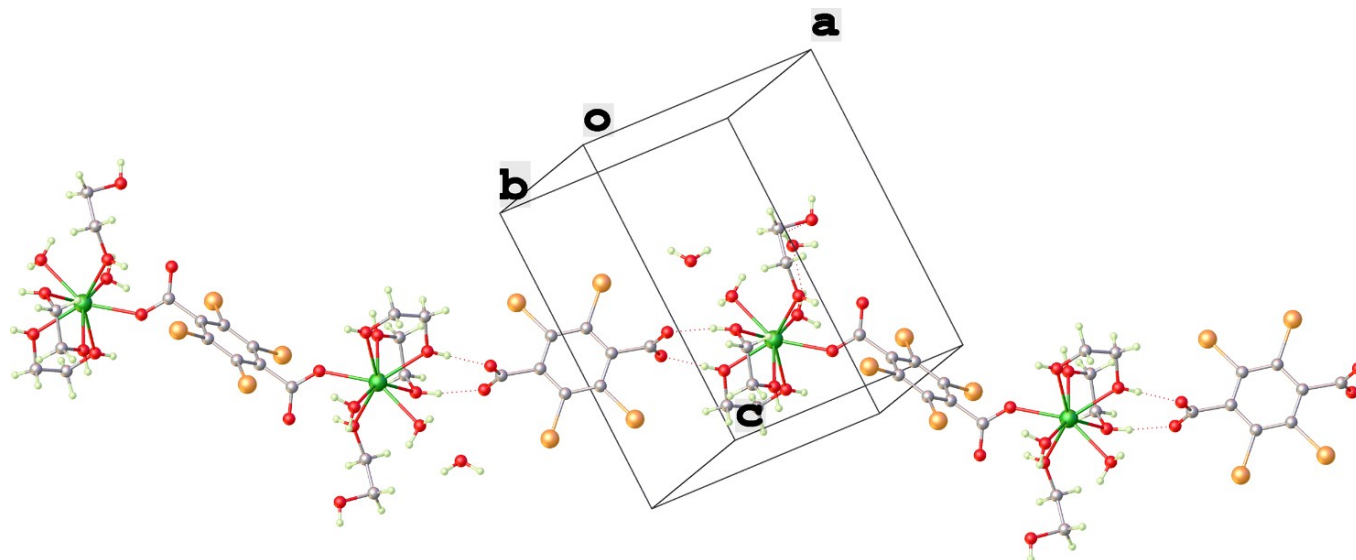

|                 |                                                                                  |              |             |                                                                         |                |
|-----------------|----------------------------------------------------------------------------------|--------------|-------------|-------------------------------------------------------------------------|----------------|
| CCDC no.        | 2130103                                                                          | $a$ (Å)      | 10.4965(3)  | $V$ (Å <sup>3</sup> )                                                   | 1606.23(7)     |
| Formula         | C <sub>36</sub> H <sub>52</sub> Br <sub>12</sub> O <sub>32</sub> Tb <sub>2</sub> | $b$ (Å)      | 12.3708(3)  | $Z$                                                                     | 1              |
| Formula weigh   | 2274.21                                                                          | $c$ (Å)      | 12.7873(3)  | $\rho_{\text{calcd}}$ (g cm <sup>-3</sup> )                             | 2.351          |
| Temperature (K) | 296.15(2)                                                                        | $\alpha$ (°) | 78.8140(10) | GOF on $F^2$ , $S$                                                      | 1.023          |
| Crystal system  | Triclinic                                                                        | $\beta$ (°)  | 82.6170(10) | $R_1, wR_2[I > 2\sigma(I)]$                                             | 0.0268, 0.0550 |
| Space group     | $P-1$                                                                            | $\gamma$ (°) | 82.6250(10) | $\Delta\rho_{\text{max}}, \Delta\rho_{\text{min}}$ (e Å <sup>-3</sup> ) | 0.92, -0.90    |

(b)

**Figure S11.** Views of 1D chain structures of compounds **3<sub>Tb</sub>**, (a) and **4<sub>Tb</sub>**, (b).

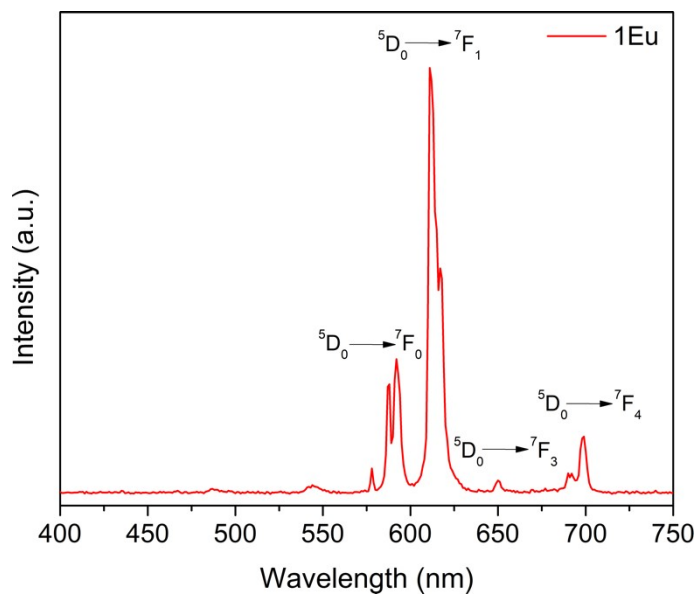

(a)

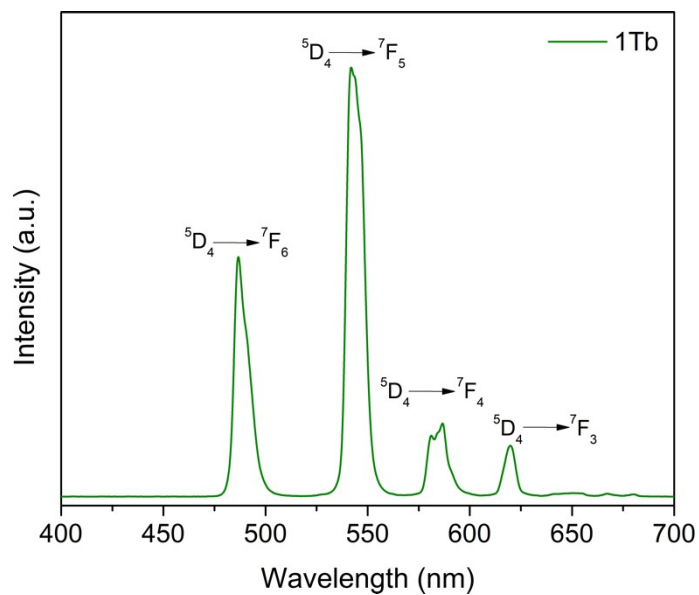

(b)

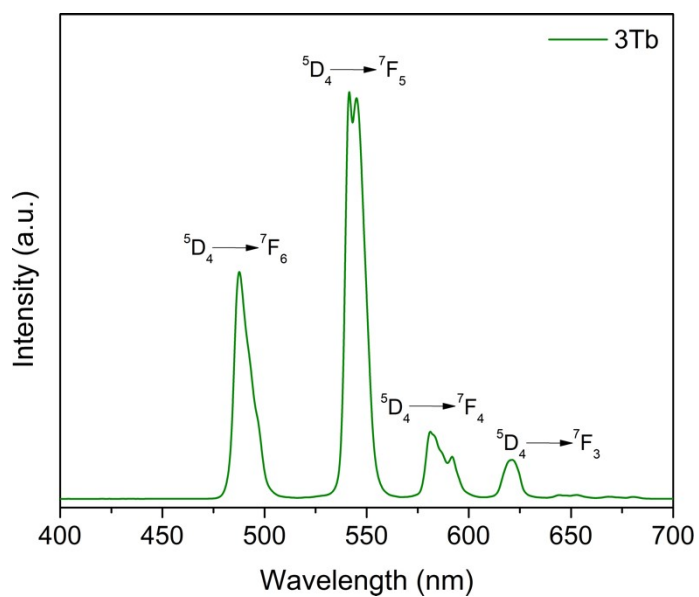

(c)

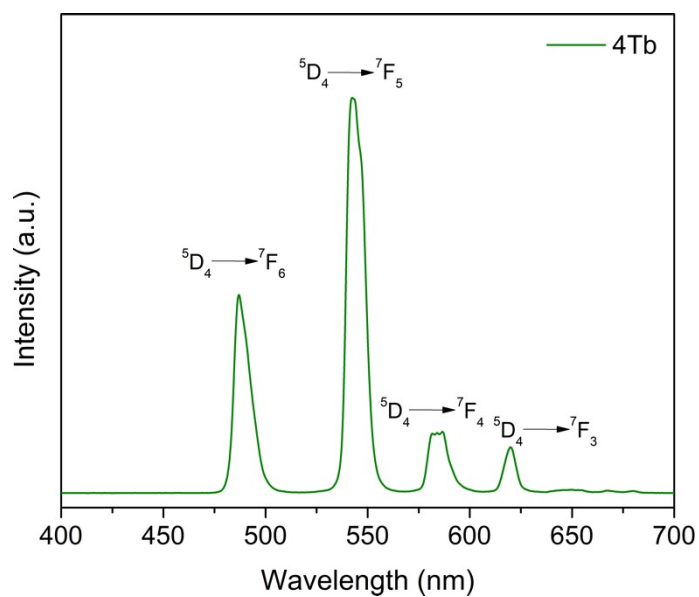

(d)

**Figure S12.** The solid-state photoluminescence spectra of **1Eu** (a), **1Tb** (b), **3Tb** (c), and **4Tb** (d) at room temperature.



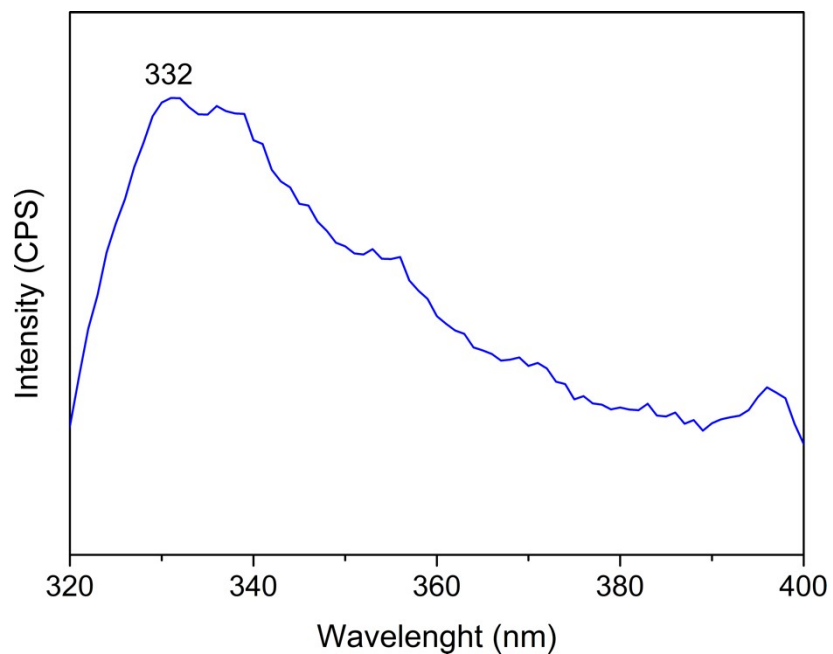

**Figure S13.** The solid-state photoluminescence spectrum of free ligand  $\text{H}_2\text{Br}_4\text{bdc}$  ( $\lambda_{\text{ex}} = 300 \text{ nm}$ ).

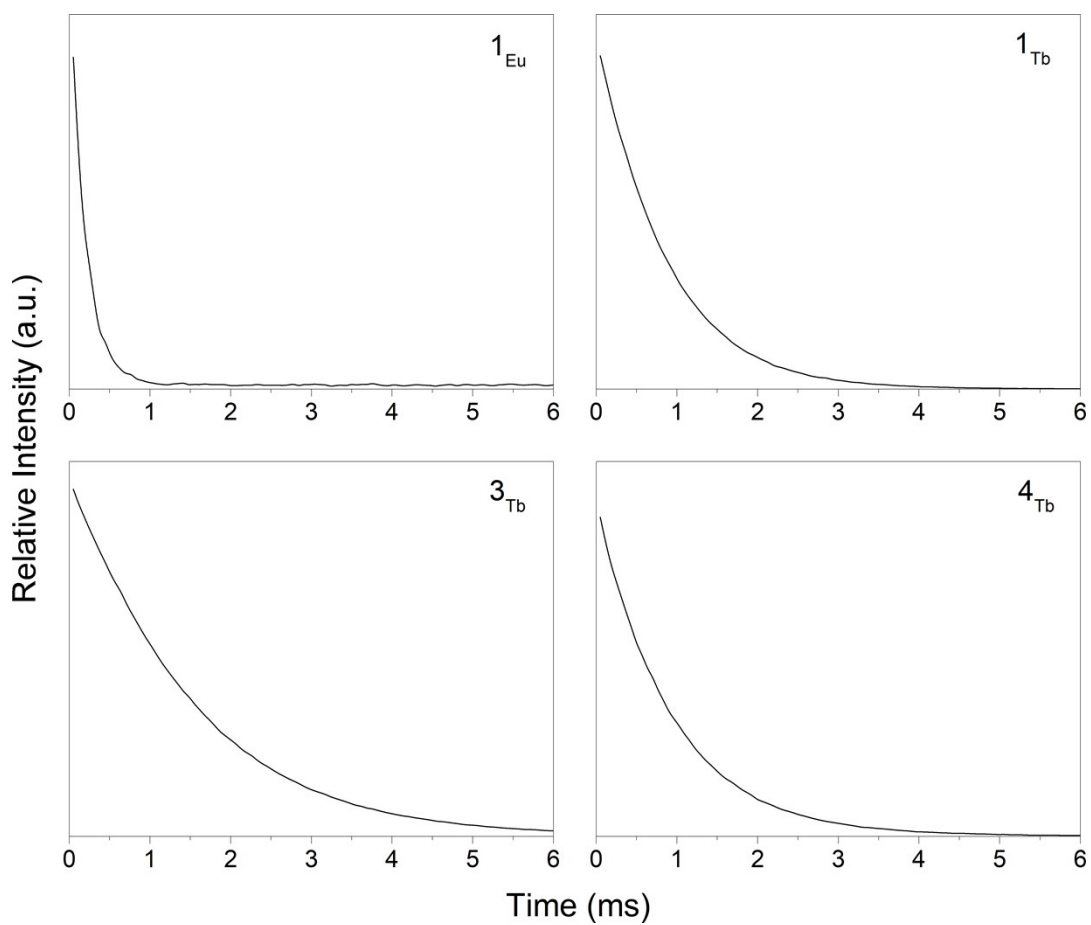

**Figure S14.** Luminescence decay ( $\tau$ ) curves for  $1_{\text{Eu}}$ ,  $1_{\text{Tb}}$ ,  $3_{\text{Tb}}$ , and  $4_{\text{Tb}}$ .

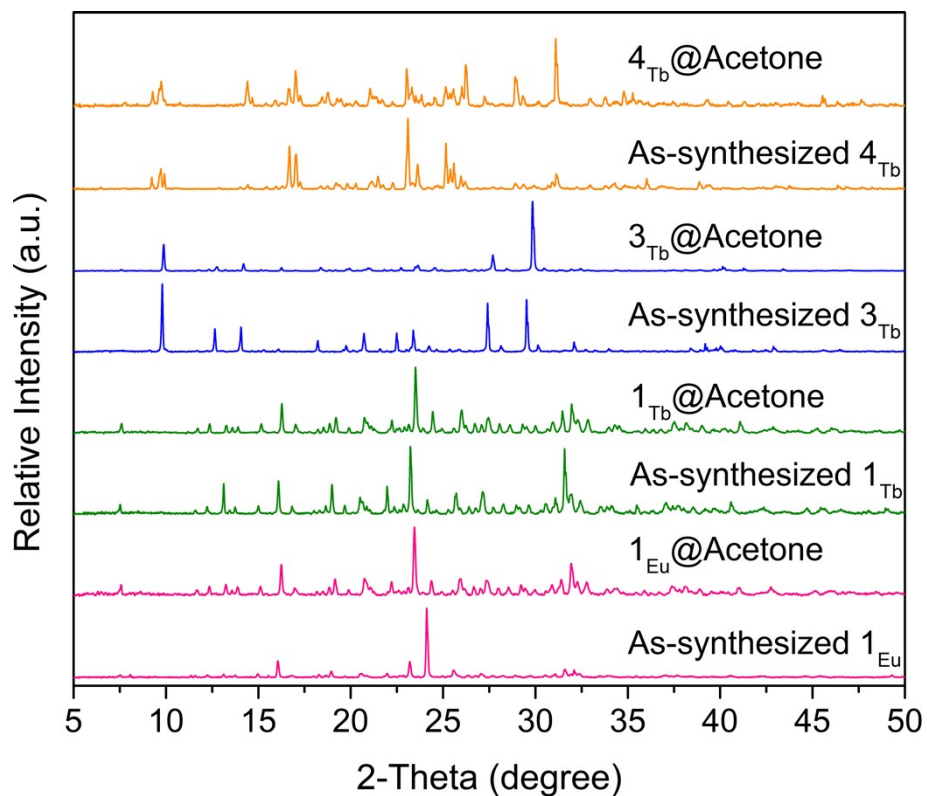

**Figure S15.** Experimental PXRD patterns of  $1_{Eu}$ ,  $1_{Tb}$ ,  $3_{Tb}$ , and  $4_{Tb}$  before and after the fluorescence quenching experiments.

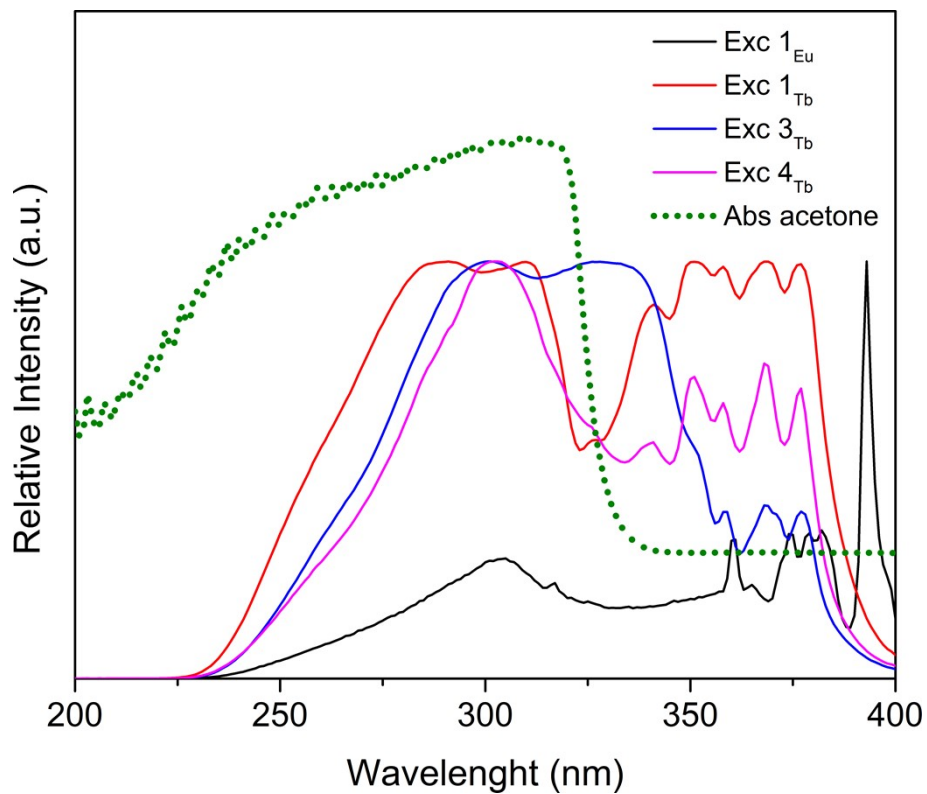

**Figure S16.** UV-Vis spectra of acetone and excitation spectra of  $1_{Eu}$ ,  $1_{Tb}$ ,  $3_{Tb}$  and  $4_{Tb}$ .

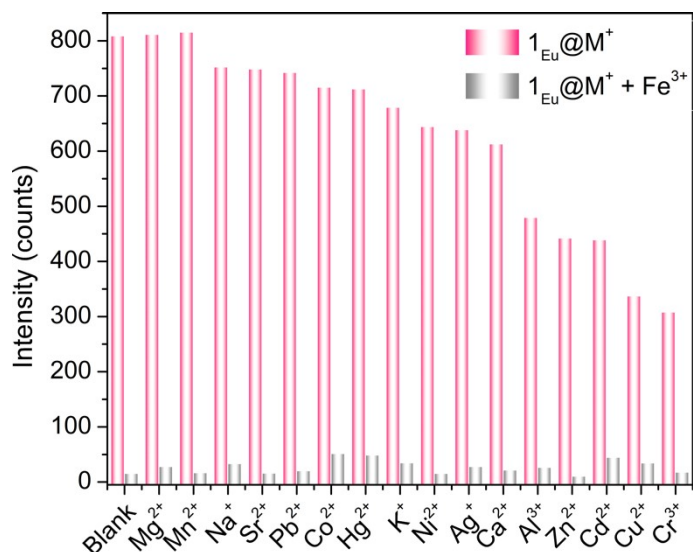

(a)

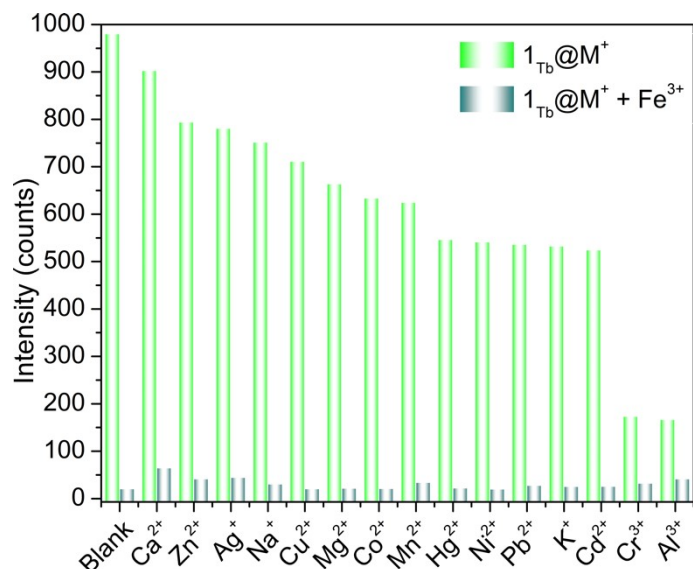

(b)

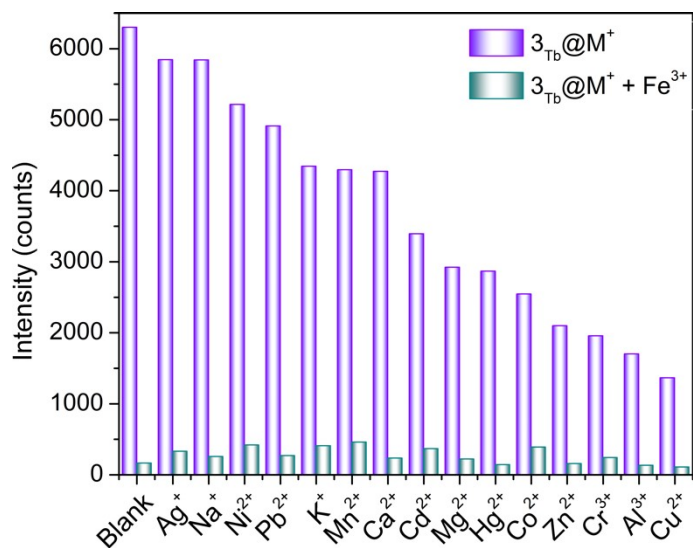

(c)

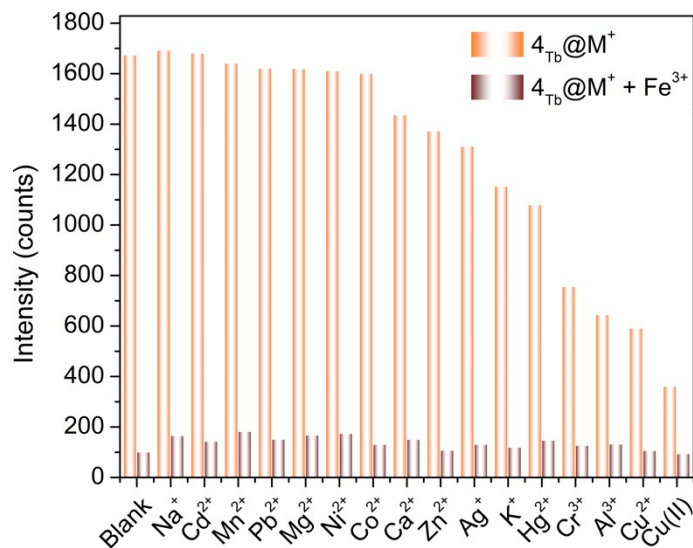

(d)

**Figure S17.** Relative luminescence intensities of  $1_{Eu}$  (a),  $1_{Tb}$  (b),  $3_{Tb}$  (c), and  $4_{Tb}$  (d) dispersed in the solutions of individual metal ions and the quenched luminescence intensities after the addition of solutions of  $Fe^{3+}$  in MeOH solution.

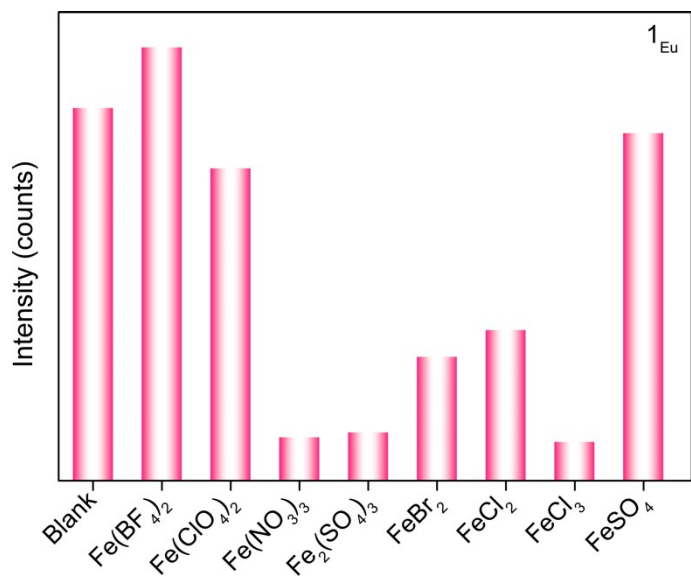

(a)

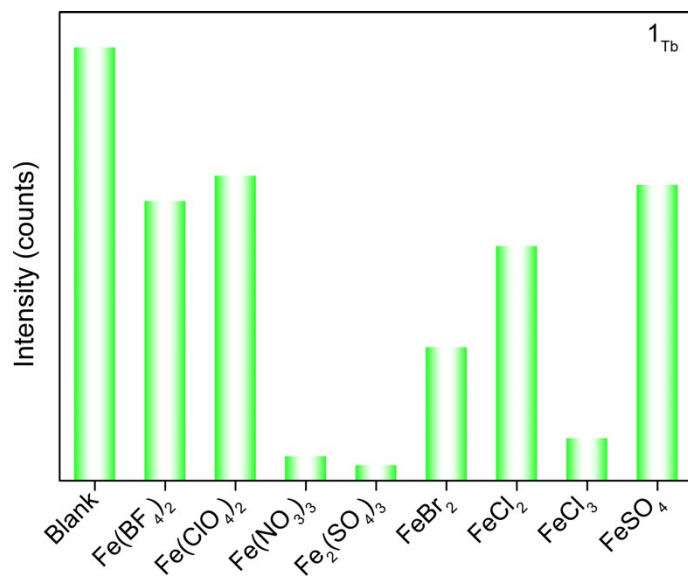

(b)

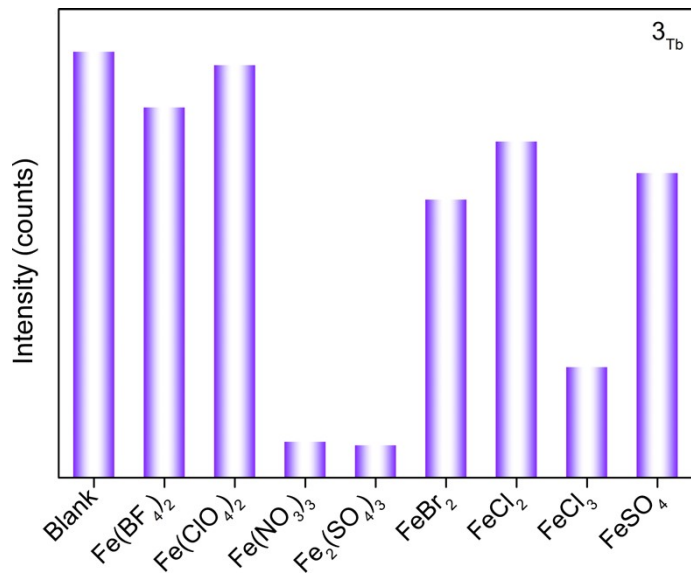

(c)

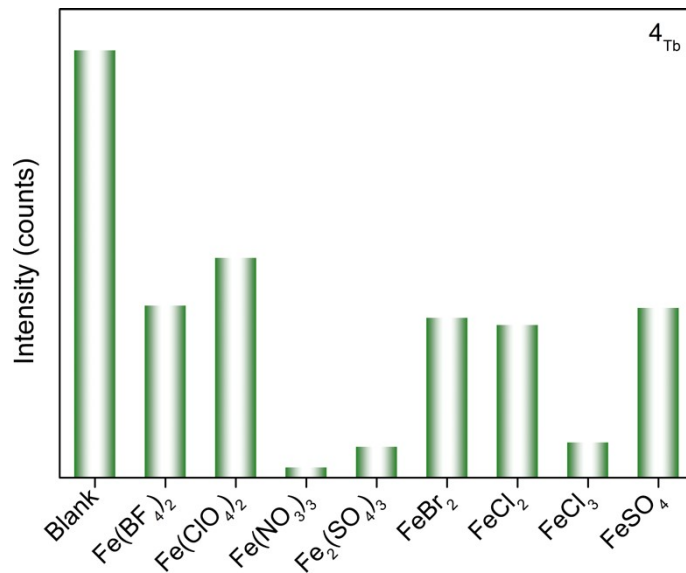

(d)

**Figure S18.** Emission intensities of **1<sub>Eu</sub>** (a), **1<sub>Tb</sub>** (b), **3<sub>Tb</sub>** (c), and **4<sub>Tb</sub>** (d) in MeOH solutions after the addition of various iron salts.

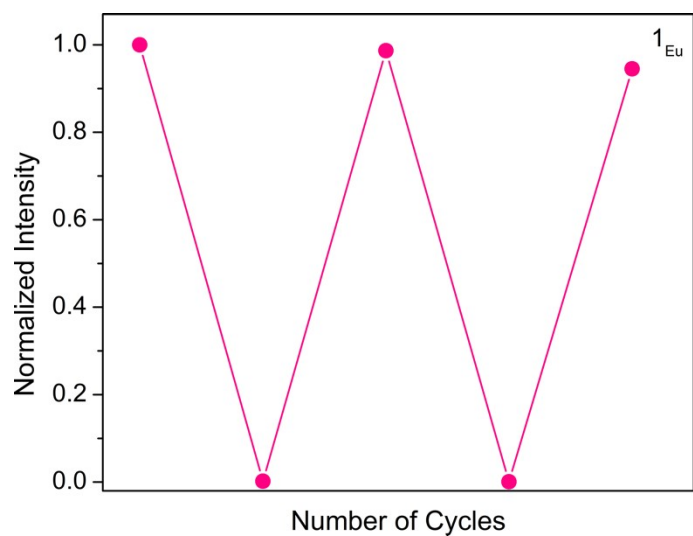

(a)

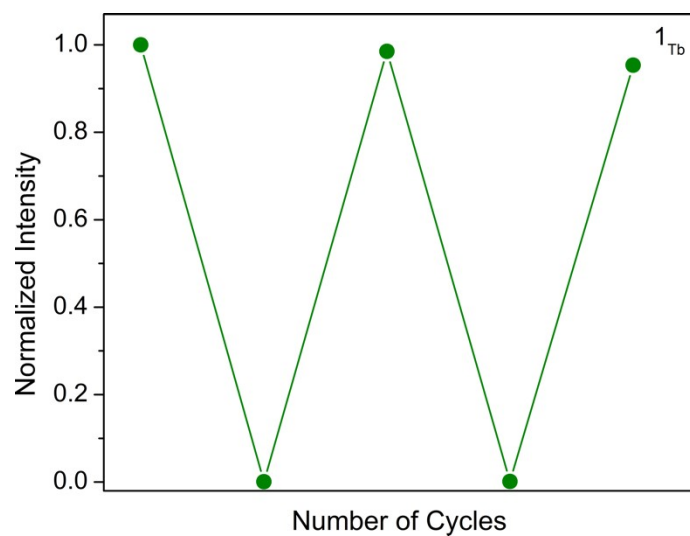

(b)

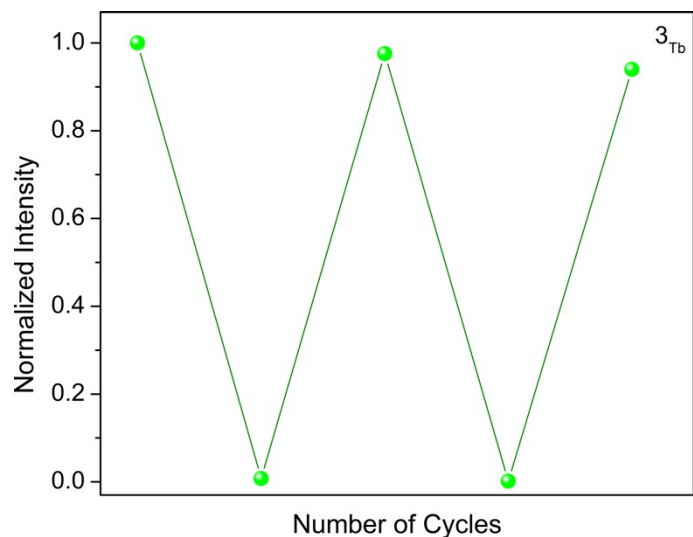

(c)

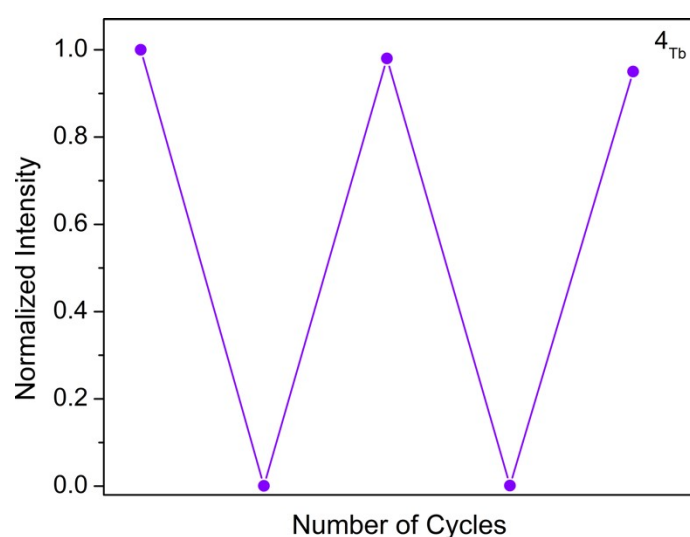

(d)

**Figure S19.** Recyclability test of  $1_{Eu}$  (a),  $1_{Tb}$  (b),  $3_{Tb}$  (c), and  $4_{Tb}$  (d) up to three cycles, the upper dots present initial intensity emission and lower dots present quenching intensity after added  $5 \times 10^{-4}$  M of  $Fe^{3+}$  solution.

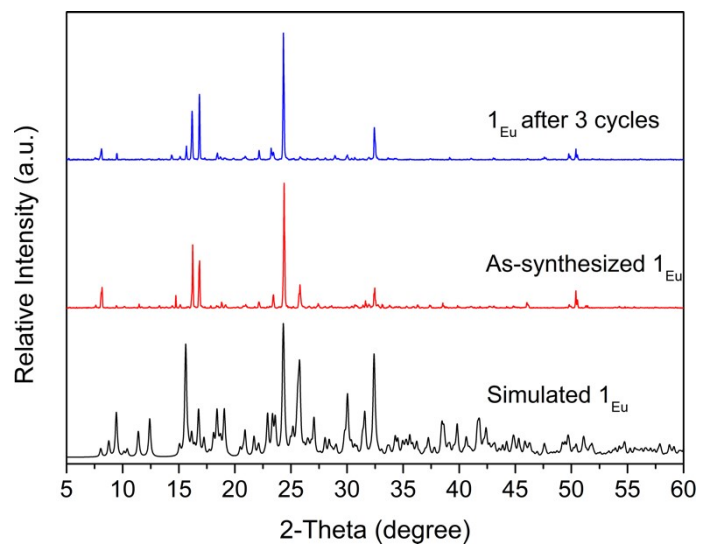

(a)

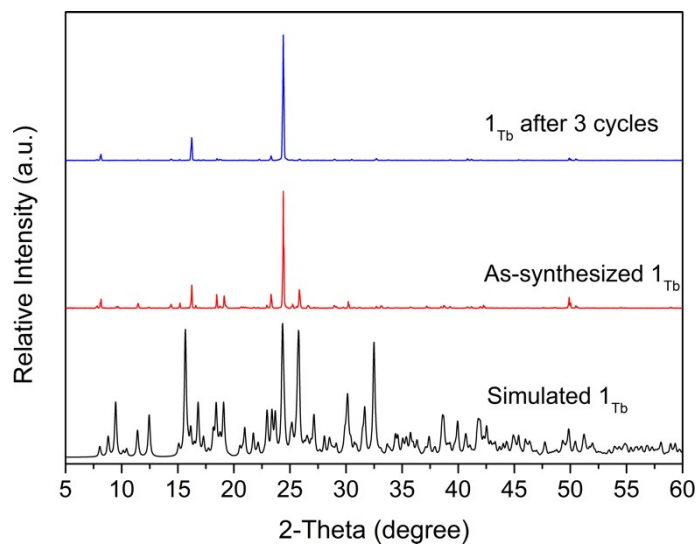

(b)

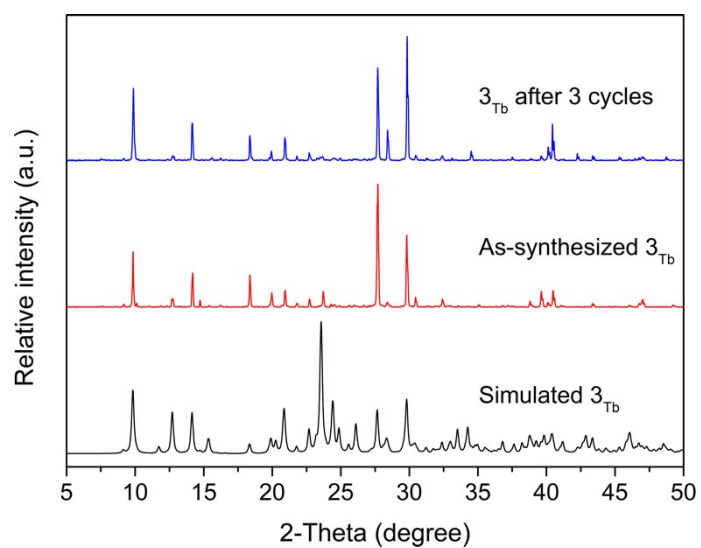

(c)

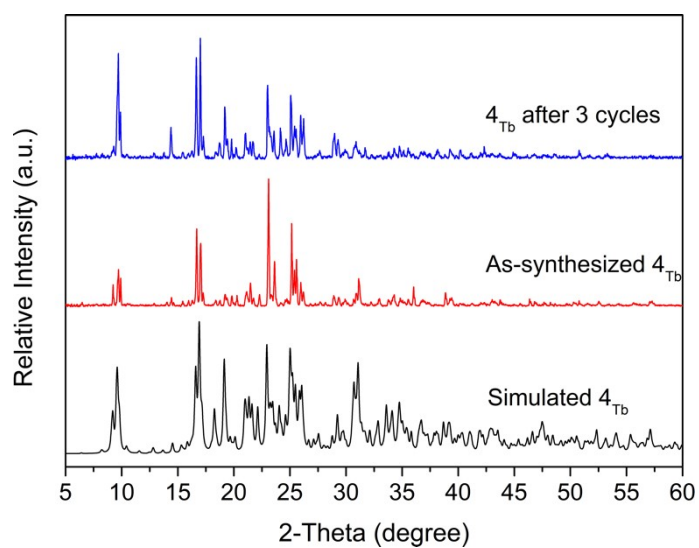

(d)

**Figure S20.** PXRD patterns of  $1_{Eu}$  (a),  $1_{Tb}$  (b),  $3_{Tb}$  (c), and  $4_{Tb}$  (d) before and after three cycles of sensing test.

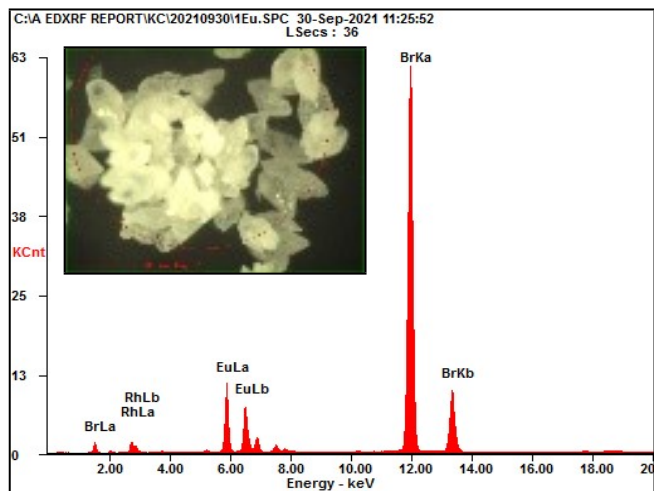

(a)

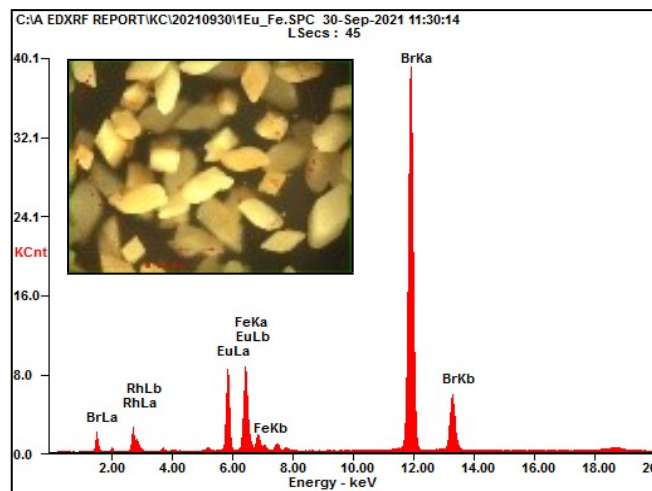

(b)

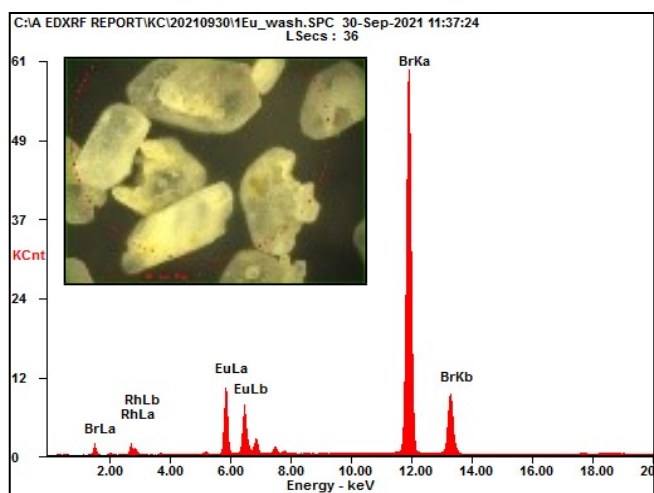

(c)

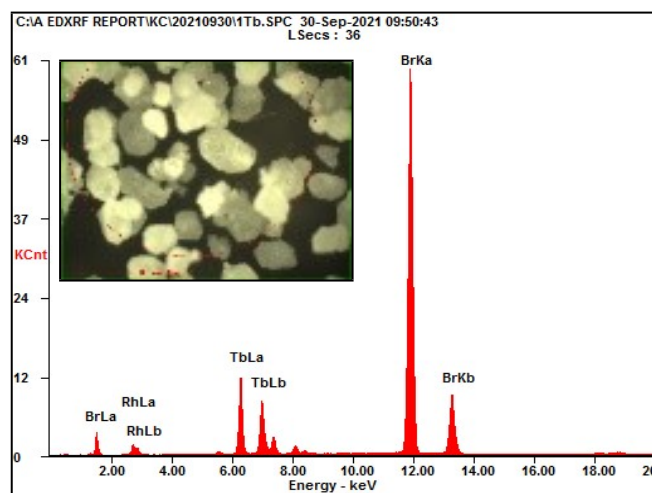

(d)

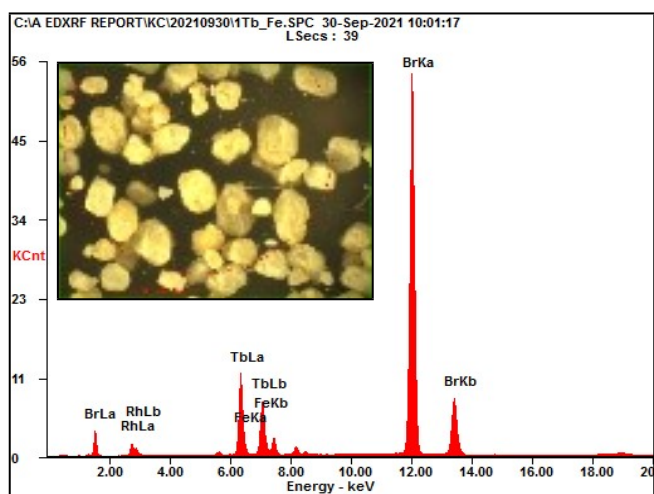

(e)

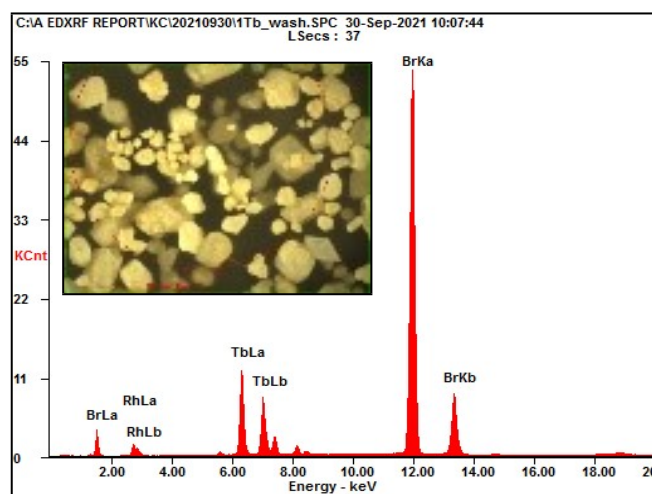

(f)

**Figure S21.** XRF spectra of  $1_{Eu}$  (a),  $1_{Eu}@Fe^{3+}$  (b),  $1_{Eu}@$ washed by MeOH (c),  $1_{Tb}$  (d),  $1_{Tb}@Fe^{3+}$  (e),  $1_{Tb}@$ washed by MeOH (f),  $3_{Tb}$  (g),  $3_{Tb}@Fe^{3+}$  (h),  $3_{Tb}@$ washed by MeOH (i),  $4_{Tb}$  (j),  $4_{Tb}@Fe^{3+}$  (k),  $4_{Tb}@$ washed by MeOH (l).

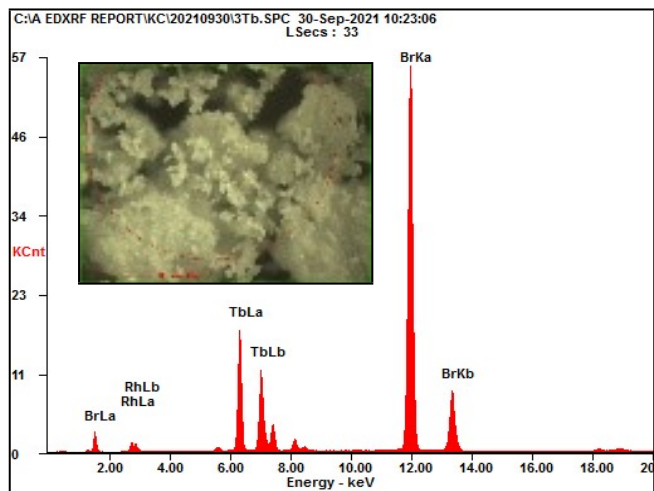

(g)

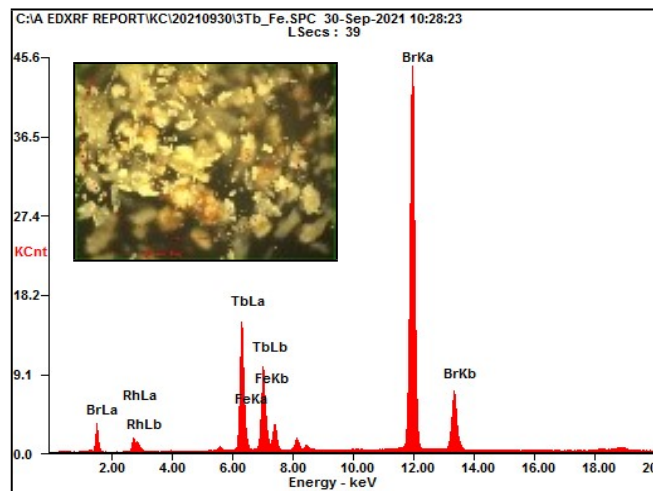

(h)

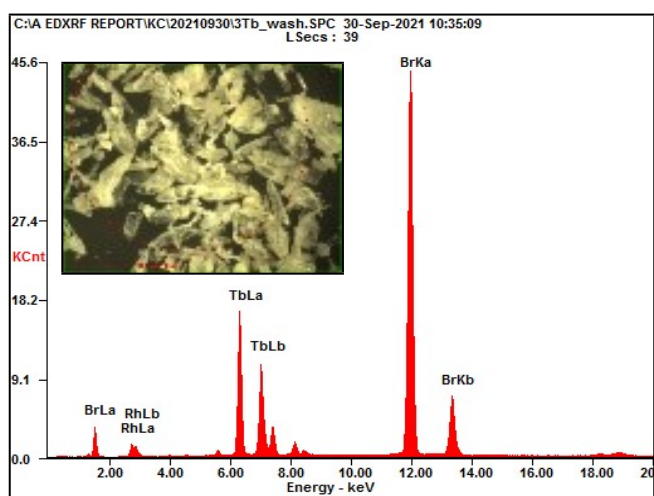

(i)

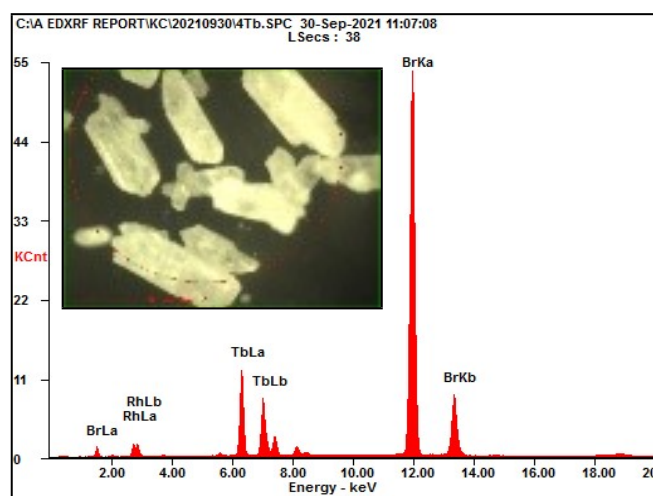

(j)

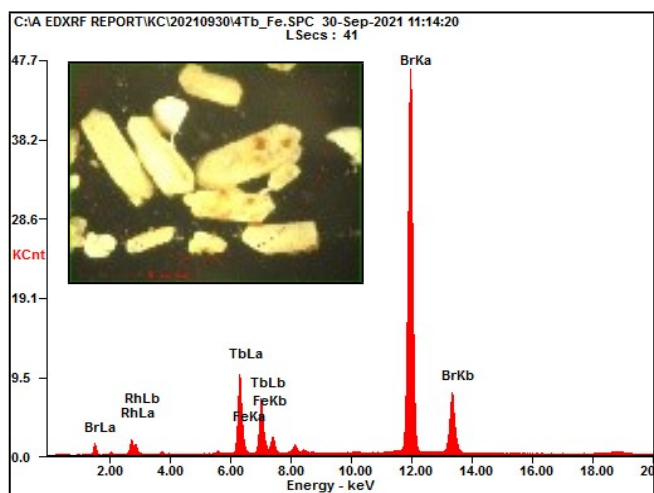

(k)

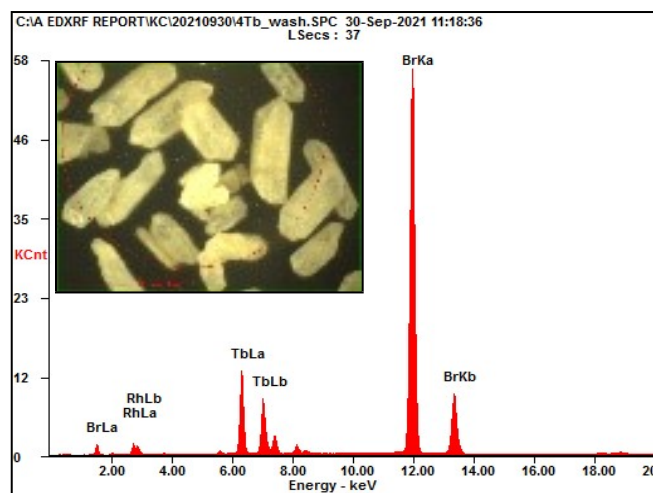

(l)

Figure S20. (Continued).



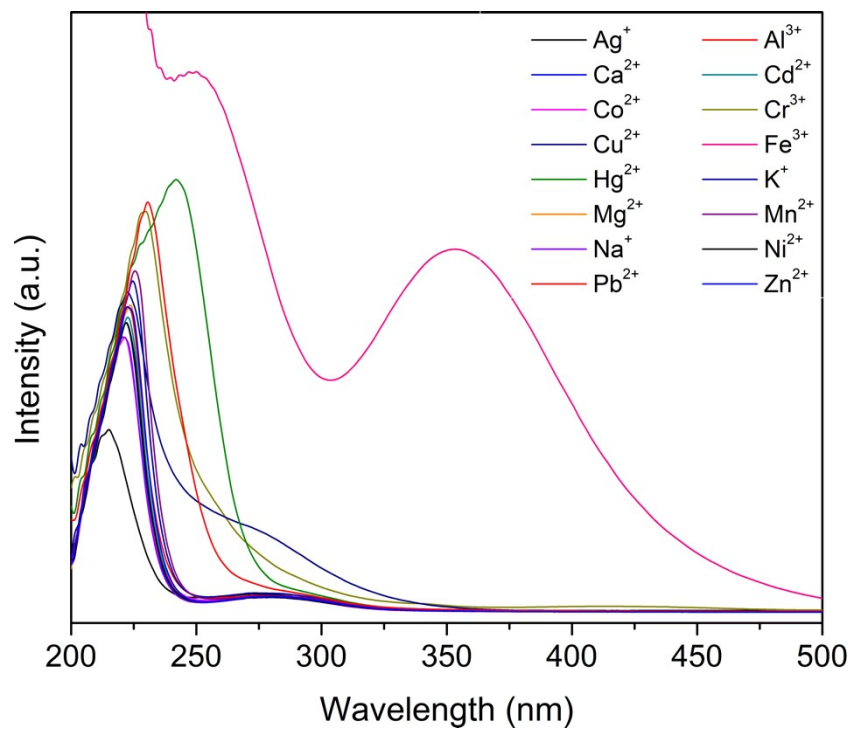

**Figure S22.** UV-Vis absorption spectra for metal ions in methanol solutions.

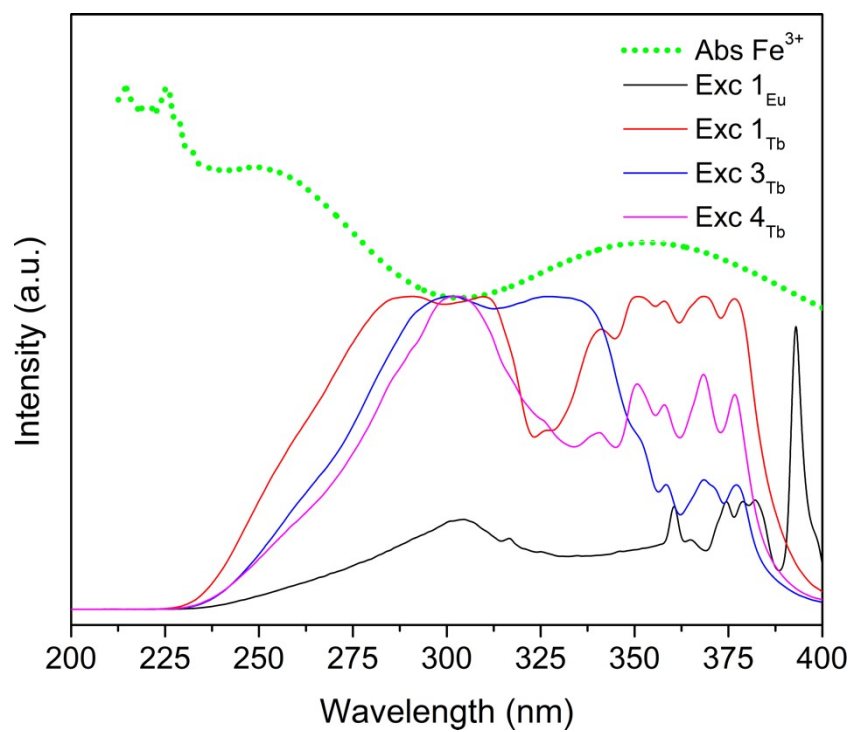

**Figure S23.** UV-Vis absorption spectra of  $\text{Fe}^{3+}$  ions and excitation of  $1_{\text{Eu}}$ ,  $1_{\text{Tb}}$ ,  $3_{\text{Tb}}$ , and  $4_{\text{Tb}}$ .

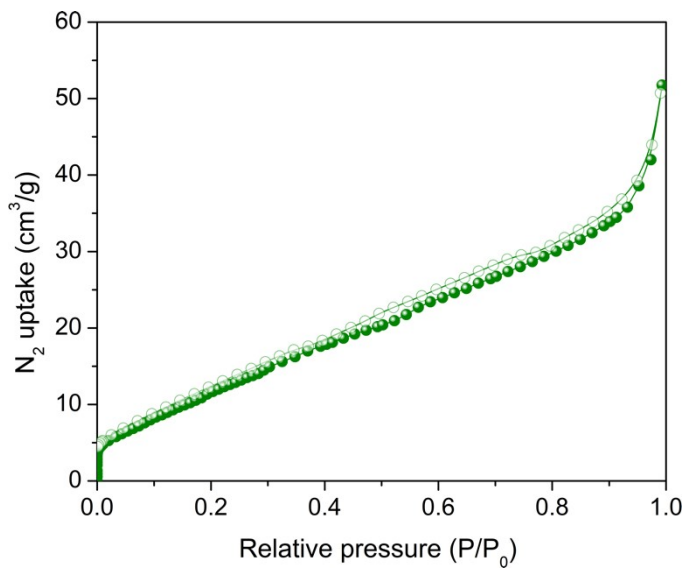

(a)

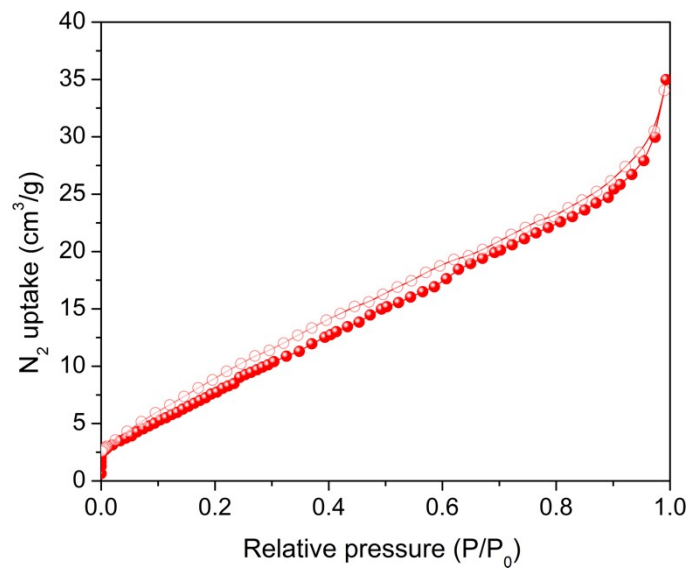

(b)

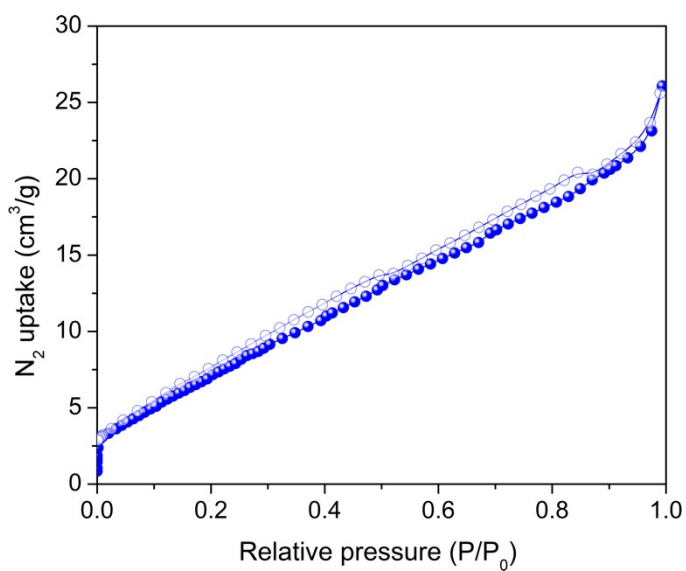

(c)

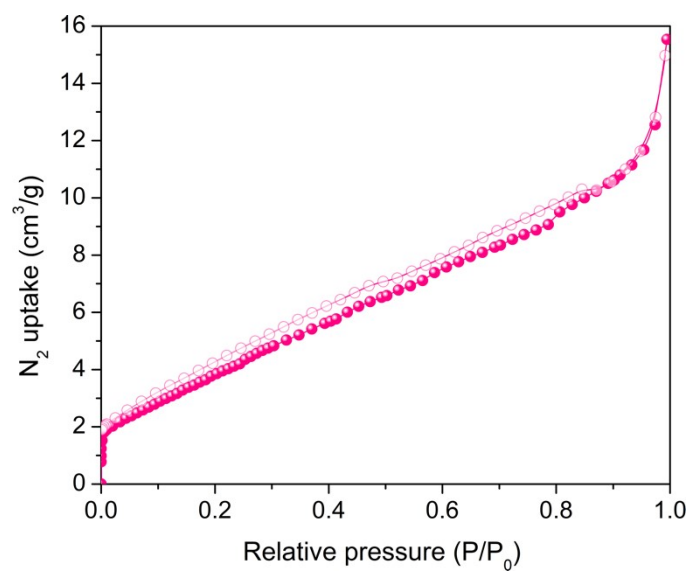

(d)

**Figure S24.** N<sub>2</sub> sorption isotherms for 1<sub>Tb</sub> (a), 2<sub>Pr</sub> (b), 3<sub>Tb</sub> (c), and 4<sub>Tb</sub> (d) at 77 K and 1 bar.

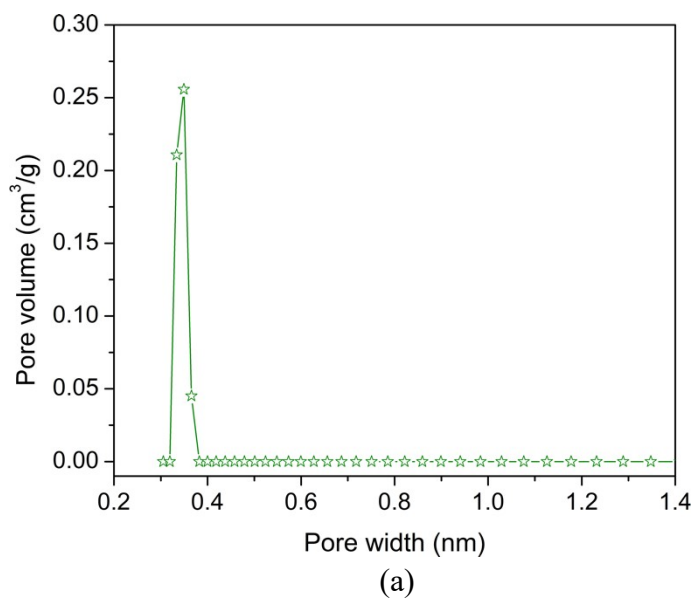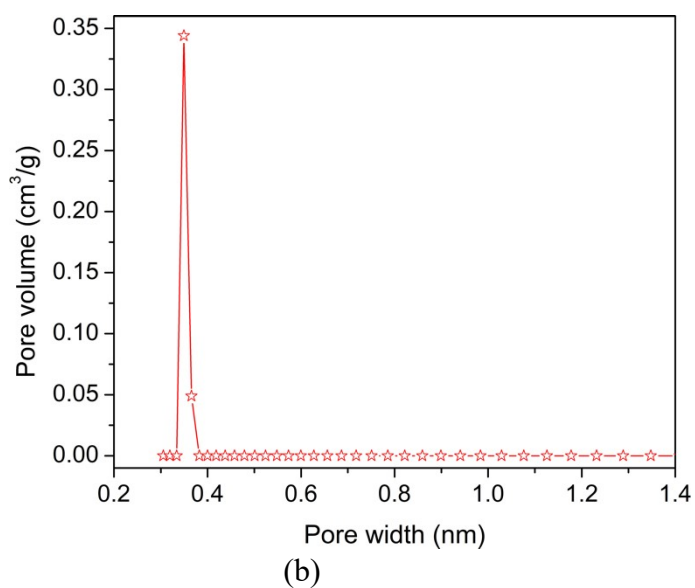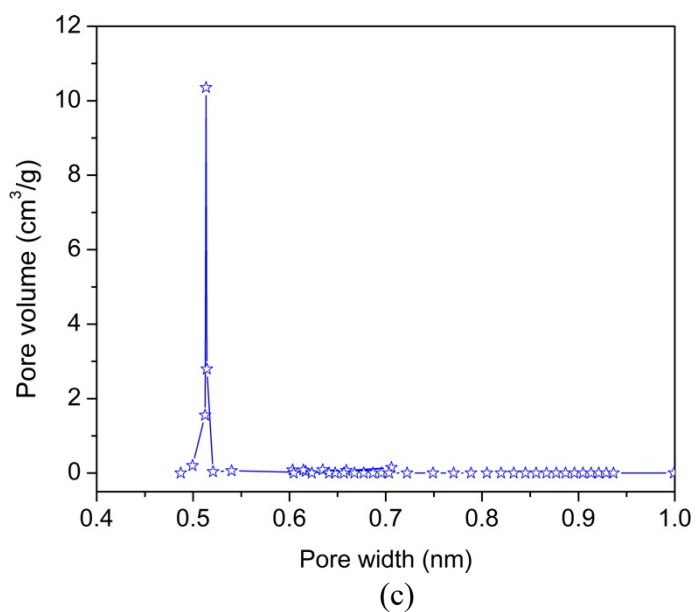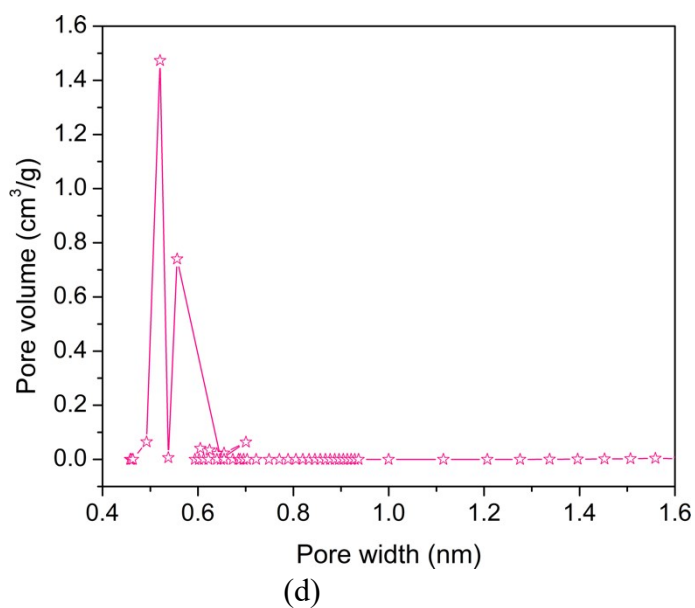

**Figure S25.** DFT pore size distribution plots for **1<sub>Tb</sub>** (a), **2<sub>Pr</sub>** (b), **3<sub>Tb</sub>** (c), and **4<sub>Tb</sub>** (d).

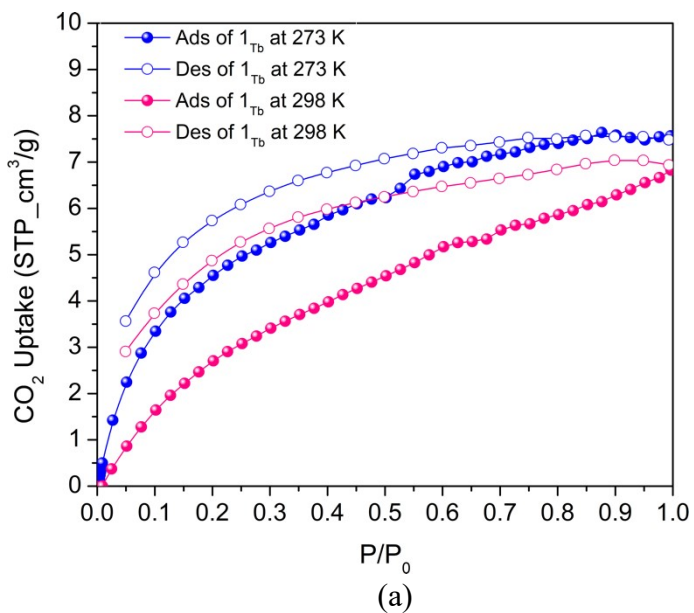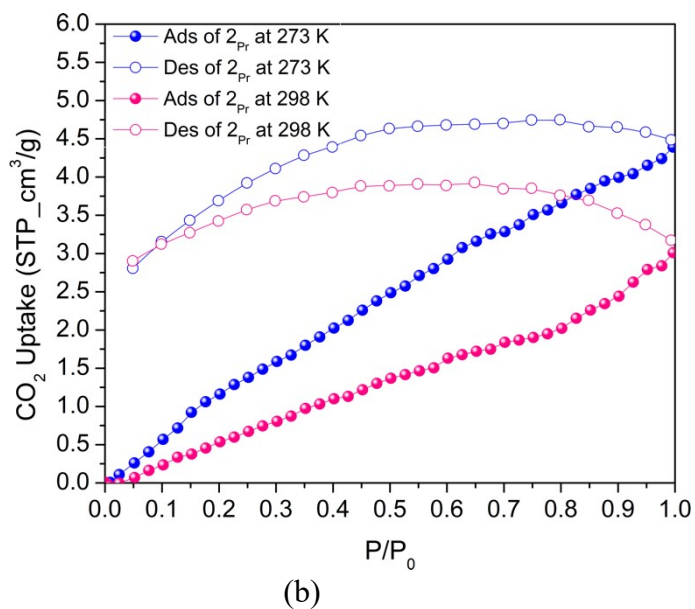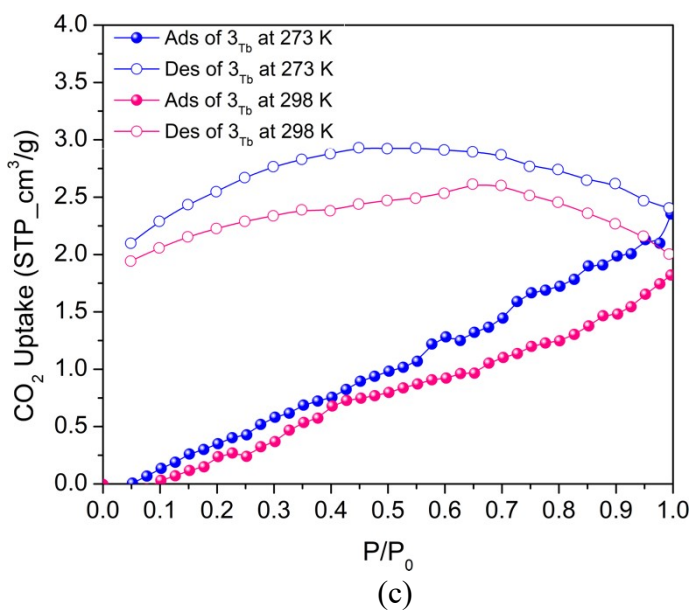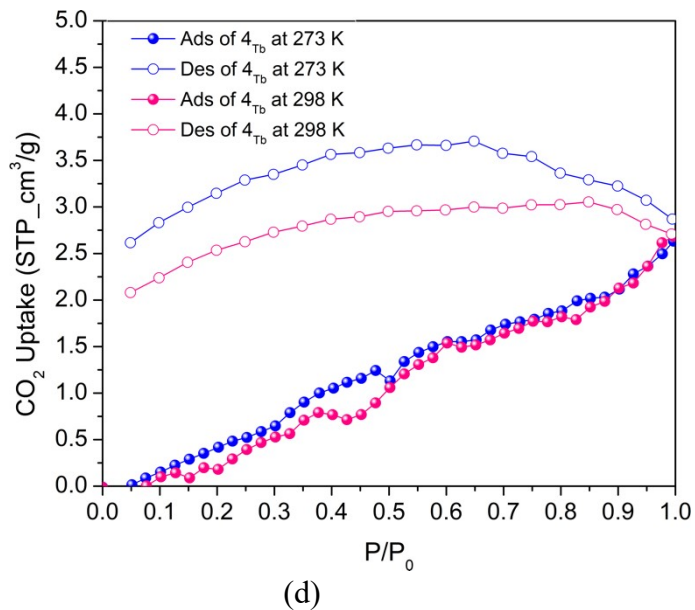

**Figure S26.** CO<sub>2</sub> adsorptions for **1<sub>Eu</sub>** (a), **1<sub>Tb</sub>** (b), **3<sub>Tb</sub>** (c), and **4<sub>Tb</sub>** (d) at 1 bar and at temperatures of 273 and 298 K.

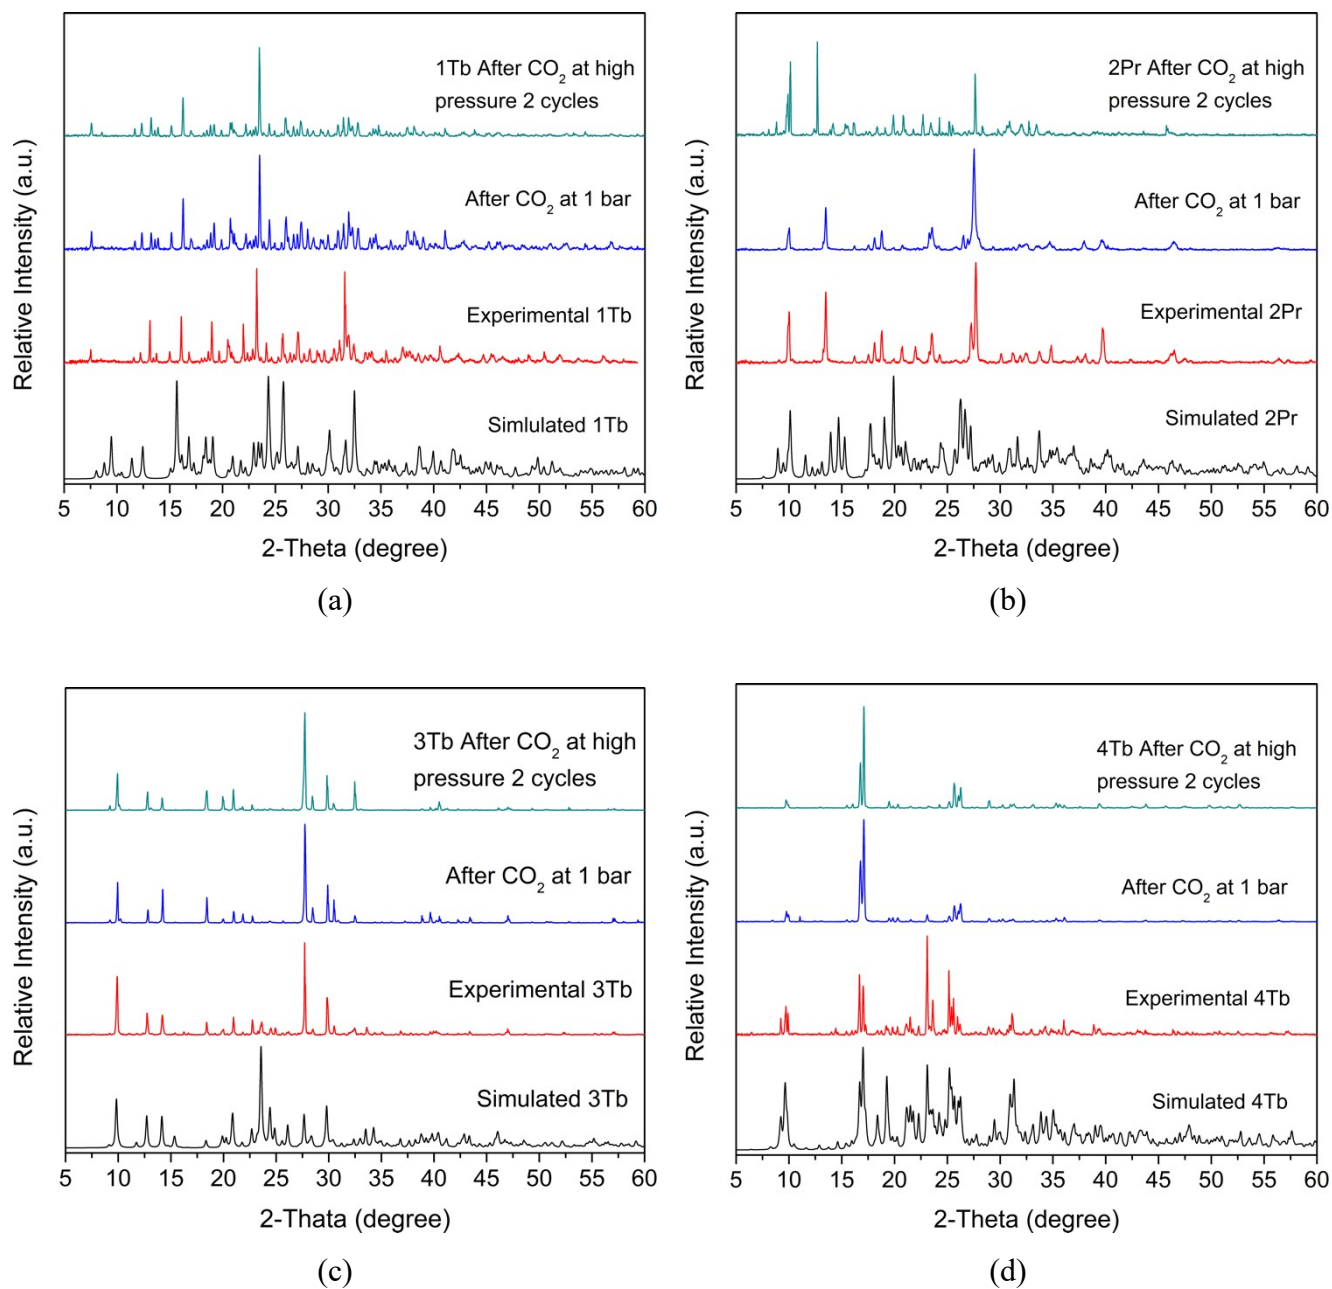

**Figure S27.** PXRD patterns of  $1_{Eu}$  (a),  $1_{Tb}$  (b),  $3_{Tb}$  (c), and  $4_{Tb}$  (d) before and after  $CO_2$  adsorption-desorption (1-50 bar at 298 K).
